# Supplementary material for: Genome-wide identification and expression analyses of SWEET gene family reveal potential roles in plant development, fruit ripening and abiotic stress responses in cranberry (Vaccinium macrocarpon Ait)
Source: PeerJ. 2024 Sep 19;12:e17974. doi: 10.7717/peerj.17974 (PMC11416763; doi:10.7717/peerj.17974)
Supplement: Supplemental Information 1 [file peerj-12-17974-s001.xlsx]

## Sheet: Table S1
Supplementary File 1 CDS sequenses of VmSWEET genes in cranberry
Gene ID	CDS sequenses
VmSWEET1.1	ATGGGTCATGATCATGTGTTGCATTTCGTGTTCGGAGTCTTTGGAAATATTAATGGGTTGTTGCTGTTTTTGGCACCGACGATTACGTTTATGAGGGTAGTGAAGAACAAATCCACAGAAGAATTCTCTGGCATTCCGTACGTCATGACCTTGCTCAACTGCCTGCTCTCTGCTTGGTATGGCCTGCCATTTGTTTCGAAAGACAACATGCTAGTGTCAACAATCAATGCCTCTGGTGCAGCCATTGAGTTCATCTATGTTCTGATTTTCCTCATATATGCACCAAAGAAAGATAAGGGCAAGATCCTGGGGCTTGTCACGTTTGTGGTCTCTGTATTCCTCGCTGTCGCCTTCATTTCCGTTTTTGCCCTTCATGGCAACAAGAGAAAGCTCTTCTGC…
VmSWEET1.2	ATGGGTGGCACGAATACCGCGCATTTCGTGTTCGGAATCTTTGGAGATGCTACTGGGCTTTTGCTGTTTTTGGCACCATTGATTACGTTTAAGAGGATCGTGATGAACAAATCCACTGAACAATTCTCTGGGATTCCCTACGTGATGACTCTACTCAACTGCTTGCTTTCTGCTTGGTATGGCCTGCCTTTCATTTCACCAAACAACTTGCTGGTATCCACAATCAATGGGACTGGTGCAGCCATTGAGGCCATCTACGTGCTGATTTTCATCATACATGCACCCAAGAAAGAGAAGGCCAAAATACTGGGACTCTTCACGTTTGTGATCAGTGTGTTCGCTGCGGTCGCTCTTATATCTCTCTTCGCCCTTCATACTAAAAAAAGCAGAAAGCTATTC…
VmSWEET2.1	ATGACGGTGTTTGCTTTTTGCAGGGAACATCTTTGCTTTTGGACTGTTTGTGTCACCAATGTTAGTTTCACTCTGAACATTTCATTTCTTAGACCCACATTTAGGAGAGTCATCAGAAACAGATCAACAGAACAGTTTTCAGGCTTGCCATATATATATGCACTCTTGAATTGCTTGCTAAGTGCTTGGTACGGTACACCTATGATGTCTCTGGATAATATCTTGGTTACCACAGTCAATTCAATTGGTGCAGTTTTTCAGATTATCTACATAACCCTGTTCATAATGCATGCCGAGAAACCAAAAAAGGTGAGGATGTTTGGGTTGCTGCTGGCAGTTTTAGGCCTATTTGCTGTTATAATAGCTGGGAGCTTGCATATAAGCGACTTCACTGTTCGA…
VmSWEET2.2	ATGGATCCAACTGGGTTGCTGCTTACCACTTACTCAGTTTTCTCTGCTGCAGCTGGAATTGCTGGGAACCTGTTTGCCGTTGTCCTATTTGTGTCACCCATACCTACATTCAGGAGAATTATCCGGAGCAAGTCTACAGAACAGTTCTCTGGATTGCCCTACATATATGGGCTTTTGAACTGCTTGATATGCCTGTGGTATGGCATGCCCATTGTATCTCCGGACGTTATACCTGTTGCCACTGTAAACTCAGTTGGAGCTATTTTCCAGTTAATCTACATAACCATATTCATTCTACATGCAGAGAAAGCAAAAAAGGTCAAAATGATTGGACTTCTGCTAGCAGTTTTGGCTATATTCGTTATCATTGTGTTCGTGAGCCTCAAATTATTTGAGCCT…
VmSWEET3	ATGGGAGATAGGCTTCGCGTGGCAGTTGGAGTGATGGGGAATGCAGCTTCAATGTTACTTTACGCTGCACCCATATTAACTTTTTCAAGGGTCATAAGAAAGAAAAGCACCGAGGAGTTTTCTTGTATTCCATACTTCTTTGCTCTACTGAATTGCGTCCTTTATACTTGGTATGGCTTGCCTGTTGTAAGCTATAGGTGGGAAAATTTGTCTCTGGTCACTATTAATGGTGCAGGCATTCTTCTTGAAATTTCCTTCATTCTCATATATTTTTGGTTCACTTCGGCCCGAGAGAAGGCAAGTTATATAAACATGCGTTCCCACCCTATGGTGCAGAAGAAGGTAGCTATGATGATTCTATTTGTTATCATACTTTTCTGCATCACCACAACAATATCA…
VmSWEET4	ATGCTCTGCCATGCAAAACTTTTTCACTCCAGCAATTTGCTGCTGGCGACAATATTTGTAACGCATTGGTTTTTTGTGTGTAGCCCAACGGTCTATGAAATTTGGAAGAAGAAAGCAGTGGAGGATTTCAAACCAGATCCGAACATTGCAATGGTGATGAACTGTATATTCTGGGTTTTCTACGGCATCATCACCCCTGGCAACATTACCGTCATCATCATCAATAGCACTGGGCTCGTCCTGGCGCTGAGCTATCTTGCTGTATTCATGTTTTACTGTAAACCGCAAAGGTGCAAGATTCTTCTTTGTCTTGGGGCCGAGGTGGTGCTCGCTGCTGTTATTGTTTGCGTGACGCTTCTAGCAATCCACAAAGAGAGCCATAGATCCATCCTTGTGGGC…
VmSWEET5	ATGTGCAGCCCAACATTCTTCAAGATATACAGAGCAAAATCGGTGCAAGAGTTCAAGCCAGACCCATACATAGCAACCATACTCAACTGCTGTATGTGGGTTTTCTACGGTCTCCCGTTCGTCCATCCTGACAGCATTCTCGTCGTCACCATTAACGCCATCGGTTTTCTAATCGAGATCTTCTACATCTGCATCTTCTTCGCATATTCTGATTGGCCAAAACGCGTATGTTATGTAAACTTTACTGTCAAAATATTAATCTTTGAATGCATATTACCGTTCTTGACGAGGATTTTGTATTGTAAGCAGCGGAAGATCCTCATCGCTCTTTTGATTGAAGTAGTCTTCGTAGTCGTCGTGATCTTCATCACCATGACATTTCTGCATACCACCAAGCGA…
VmSWEET10.1	ATGGGTGGTTTGTCTTCTCACAATTTAGCTTTTGCATTTGGTCTTCTAGGAAACATCATCTCATTCTTCGTGTTTCTTTCGCCGCTGCCAACATTCTACAAAATATACAAGAAGAAATCAACTGAAGGGTTTCAATCAGTTCCATACGTTGTTGCCTTGTTCAGTGCTTTGTTGTTGATGTATTATGCATTTCTCAAGGACAATGATGGCATTCTTATCATCACTATCAACTCATTTGGTTGCTTGGTTGAGACAATTTACATAGCCGTCTACTTCTTCTATGCACCCAAGAAGCTTAAGGTCTACACAATCAAACTACTTTCGCTGATGATTGTCGGCTTCGGCCTGATTGTTGTCTTAACTCAATTTCTTGCTAAAGGCCCAACTTGCCTCCAGATT…
VmSWEET10.2	ATGGGAGCACTTACCAATCACAATTTGGCTTTTGCATTTGGGCTTCTAGGCAATATTATCTCATTCTTCGTGTTTCTTTCTCCGCTGCCGACGTTTTACCAAATATACAAGAAGAAATCAACCGAAGGATTCCAATGCGTTCCATACATAGTTGCCTTGTTCAGTGCGATGGTGCTGATGTACTATGCATTTCTCAAGACCGATGCCACCCTTCTCATCACAATCAACTCTTTTGGTTGCTTCATAGAGACTATTTACATTGGGGTTTTCATCTTCTATGCACCCAAGAAGATTCAAACTGTGAAACTGCTTGTGTCGATGATTGGAGGTTTCGGGTTGATCCTCATCTCAACTCACTATCTTGCAAAAGGCCCAATGCGCGTCCACGTAGTTGGTTGG…
VmSWEET12	TCTATTGGCTATTACGTCAAGAACTCACTCTTTCCTCTTAAAAACACTTTCGTAGGTAACATTATATCCTTCATGGTATTTCTTGCCCCGATACCGACATTTTATGAGATTGTTAAGAAGAAATCTGCCCAAGGATATCAATCAATTCCATATTTGGTTGCGCTTTTTAGTTGTATGTTGTGGATATACTACGCATTAGTCAAGACCCATGCTATGCCTCTTATCACGATCAACTCGATTGGTTGTGTTCTAGAGATAACTTACATCGCAATCTACATAGCATATGCATCAAAGAAAGCCAGGATGACGACTTTGAAGATACTCGCTCTCTTCAACCTTGGGGGATTTTCGTTGATTCTCGTTTGCTCCTATTTCTTAACAAAAGGATCCAACCGAGTC…
VmSWEET13	ATGCTATTAGTAGTAACATTGCATTTTAAATATCTTGCAGGTAATATTATTTCCTTCATGGTCTACCTTGCTCCAGTGCCAACATTTTACCGGATTGTCAAGAAAAAATCAACTGAAGGGTTTCAGTCATTCCCTTATTTGGTTGCACTTTTCAGTTCTTCGCTATGGATTTACTATGCCTCCGTTAAGCCCAATGCTTTTCTTCTCATTAGCATCAACTCTGTTGGTTGTGCTATAGAGACTCTTTATATTGCTCTATACATTGCTTACGCACCGAAGAAATCGAGGATGTTGACCGTGACCCTCTTGATTCTCGTCAACTTCGGGGTATTTTCTTTGGTCGTTCTTTTCTCACACTTCCTAGCAAAAGGGTCCAGCCGACTTCAAGTACTTGGGTGG…
VmSWEET14	TCCTTGTACGGGAAACCGTTAATGAAATATTTTCCCTTTGCATTTAATATTTCAGGTAACATTGTTTCAATCTTTGTGTTCCTTGCTCCATTACCAACATTCATCGAAATATACCGAAGAAAGTCGATTCTAGGGTTTCAATCCCTACCATATGCAGTTGCGCTATTCAGTTCTATGCTTTGGATGTACTATGCATTCCTCAAAAAAGATGCAGACCTTCTAATCTCCATCAACTCGATCGGATGCTTCATCGAGACGATTTACATCATCATTTACCTCGTTTATGCTTCGAAGGATGCCAGGAAACGCACCGCGACGCTACTTGTTTGTATGAACGTGGGACTCTTCGCCGGTATTATGCTCCTTACACTCTTCCTACTCAAAGGCCAACCTCGTGTC…
VmSWEET16	ATGAAAACCTTTTGTGAATGCAGAAGTACATTTGGGAGAATTATAAAGCGCGGATCGACGGAAGAGTTCGAAAGCCTTCCTTACATTTGCACATTGTTGAATTCTGCACTGTGGACTTATTATGGACTCATAAAATCTGGTGAAATTCTTGTTGCCACTGTCAATGGTTTTGGCATCTTTGTTGAAGCTATCTATCTCTCCATATTTCTCATTTATGCACCCAGAAAGATGAGAGCTAAGACTGCAATTCTTGTGGGGATTCTGGACGTGGGTTTTCTGGCAGCAGCAATTTTAGTGACTCAATTGGCTTTGAAAGGAGATGAGAGAATAGATGCCATGGGAATTTTGGGTGCAGGGCTTAACATCATCATGTATGCCTCACCATTGGCTGTCATGAAA…
