# Supplementary material for: Genome-wide identification and expression analyses of SWEET gene family reveal potential roles in plant development, fruit ripening and abiotic stress responses in cranberry (Vaccinium macrocarpon Ait)
Source: PeerJ. 2024 Sep 19;12:e17974. doi: 10.7717/peerj.17974 (PMC11416763; doi:10.7717/peerj.17974)
Supplement: Supplemental Information 2 [file peerj-12-17974-s002.xlsx]

## Sheet: Table S2
Supplementary file 2 Promoter sequenses and cis-acting elements of VmSWEET genes in cranberry
Gene name	Promoter sequenses		Gene name	Starting position of cis-acting element	Termination position of Cis-acting element	Cis-acting element name
VmSWEET1.1	cattattatggggagaggcaagcacacgatgtttatgatttacgagccttcctccatgttatgcaccaccaacccccaccaccaccttttgtgccaccctactatcctccttacccaggggatttatcggtggggagtgatgaggattgattactttgtcgtctctagatgtacaatgtccttagtattatatctttttgttcttttctttctttgtcttttgttgtgtcttgcggactaacacatataggtttcttggtttaattgggggggtctcttctcaacctatttttctcttgtgtgttcccttgttcgaggtgatctctctctctctctctctctctctctctctctctctctctctctgtccttctcttttaatgtctctgcgttcaatgc…		VmSWEET1.1	66	86	AC-II
VmSWEET1.2	gtccttattcaattttttttttttgcatttgttagttttgcatcaagattttgtgatttctggatttttctcgacgagacaaatctaacaagtataaaaaaaattgagttttgactataattttatacttgttagattcatctcgtcaagagaaatttagaaacacgaaatcttattgcaaaacaaatgaatgcaaaaaaaaattgaataaggacaaaagtggttttttggtttttggcttttggttttatacccaaagcaccctatgtttccaaaaatcctatggattccgacccatatgtccagaaaagaaaacgtacagagcatgctcgggaacttacttttgggttctgcacgagtgatccgaactgttcattattcttacaacatttttacgag…		VmSWEET1.1	85	105	P-box
VmSWEET2.1	agtatccaccatggttctgtttgacgatccaacctgataatattataggtcttggtatgattgagtgtcaagtcgatcgggcatccattaaagccaggcctgaatcataattttcagaagataagcaaatggccagggttcgacaatctgctcctcttgtgacaaatttttttcttccatatggatatctatgtcagatgaacttaattttttgtatgggtgataaacacatcgagacttacaaaataaattacttagaccctcaaatgagaccggaagaaatatttgctgaatatgcttggagaggataattgctctaaagtgtgcatgtatgtcccttgtgcgctgaatatgcttttagaacatggtaatgcatcttatgttcaggccagatgcctt…		VmSWEET1.1	117	137	STRE
VmSWEET2.2	aggagggttgtgggtcgctgggccaggggagggggagagagagggcagtaacgttgtgggagagagagggagatagggtgagggtgggatatgagaggttgagtgcaccaagccaacttctaatctcaaccattggtttcaatgactgagatggagtgtcaaaatttgtatttttttgtgtgaggaggaccggccctatatatatatatatatatcttcaaatataacatgttagttcatactcaaccctgcatctatagaataccaaacatgatacttgtgttaccaactttacttaccatcacaaaatccaccatgttgtacgagattataatggtatttgctggatattttatttgatcaaaaaagttgcaaccaaatgcgattcattgagattag…		VmSWEET1.1	146	166	CAAT-box
VmSWEET3	ttggttacatgaaggtctatttggatcccctctctttattacctggcctcaaagttcgggttgctggaagtcacggatcactcgaagtcttgaaataaaaaaaggattgctaatgtagtctgcaattcatgtgtccactaatgcgatgagagcaacgaaattttgtggtgttatgacaatagagtcagatagagaagtgtgaaacttttgattgcactggacaactaaaatcatgctgatgtttgacaggatagcacgtccagaataattttacagccagaaagacatgggactaaaatatttgaccatttttgtagcttctgtaatactttctgaacagtaatgatgaatctagatagtgaatgtaaccaatagataatgaatgttttcacattttct…		VmSWEET1.1	174	194	CAAT-box
VmSWEET4	tcccatgcaaaagattgtacgggatagagagagaagttgttacgactatgagtcttagagagagagagagagagaaagggataattaaatctgaaatcagataattgttgaagttaatcctgatcctaatccaaattatcggggttaattcgatacagattaggagtcctggatatattgtagcgatttctgataactgtttgatttacttgcacacaaagtcgggctcctggctttgtatataaacagtctcttcacccccacacaagtgattcacaccattatcacctctctctctctctctctctctctctctctaaaccaagcttcgaagatgttgagcgccgaacatagtcgcttgatcctcggcattgtcggtatgcgcttcaaactctctct…		VmSWEET1.1	187	207	TATA-box
VmSWEET5	tttgttacctctcatcctcttcttcttcttcttctaccacaactccatatctcttcctcttccttgatctcatatttcattaaaaaatgatcgatacagagacagcgcggacaatcattggtgtcattggttagtaaacaaataaattatgttaatttcttatttgcatcatgatccatttacatggccaattattttttcaccattcattagtttatcgttttggttttctctctctctctctctctctctcacacacacacacacacacacacacacaaacacaaacactgtgcgtgtgtgtgagtgtttgttttcatcgtcgtctataaaatttagcagattaaagagtaacggtaaaatgataagtacttgaactaaaactaagccaatgtagaa…		VmSWEET1.1	188	208	TATA-box
VmSWEET10.1	gagagcactaggcaaaggccctaggcaagactcctcctagcccctcggctaggcaagagcgctcggatggagtgctaggcgaaggccctaggcaagactcctcctagcccctcgactaggcaagagcgctcggattgagctctaggcaaaaggacccatgcggagatttcaggcggctcaagaagttcacggaaggttcacaccggaatcgactcccccacaaccttcttcatcacacattatcacactttgtgatagagtccataccaatgtgcagtggaaaaggtccctgtgacagtgctccaggaggaattaataactttccaatatcctccagtatcattttctgttgctgctatgcttactgtttacttaagcagttccgctgctgctgttttt…		VmSWEET1.1	189	209	TATA-box
VmSWEET10.2	ttatgaaatgaaagaaaatgttacgaattatattatctaaaagttacgaattcttagtataaaagttacaatacaaacgaaaatattacgaattaccagttctcaaggtcattttttatgaggtggggcaacatggatcacacaatggatacatatcatacaccctaaaaggggatgtttattgtagatttttccaataaactttggtgctgtactcctcagttttacgtacaaatcaatttgcaaattacttttaatctttttggttgaaacaaacaagacaggcaaagtgtggaagaaaagcatgtttgtgatgagtaggttaaaatctttcgaacaactgtaaagagaaatggaaagttttttcgtgcatactgttccattggagtgaaaatatct…		VmSWEET1.1	206	226	AAGAA-motif
VmSWEET12	acgtggtgctctagggcctttccctctaccagacattgatatgggctccatcataaagtgtgtttctctcacaccaatgtgtgatgggaaagggtcgtggagcgccacttgacagttatccaggactcttactaaattattgctcatatacggcatgaacctgattaattgtctcaaaatttgaaagccatattaaatttgagagatcaatccatgaagccatattaaaattgcaaatgaggttgaatagatgcaaaaagaaggattagaaagaagaaattacttcgtacagagcttgggataaaagctatgaagttaacaattaaactaagatcagatattttcttttgtgtgttcattagtgagatgttctggatcatgaatgaagaaagcatgata…		VmSWEET1.1	246	266	TATA-box
VmSWEET13	tcgagactagttagcgtactagttcaaacgagatagatacttgaatccataagagaaagagatgaaactctgaattataattgattaaaagatactgaaattgaagtaaagcgattagattccctttcataggcaaactctagcaaacactactaaaataaaagtatcccaaaaattagggaaactttcaaaattgaaaactagaaagaaaaacaatatagtttcaattggaatcaacttcaacaaaattaaagagtaattcataatctaaataattccttaaatagcaaaattaccaaattgaaagccaaaataaagaaatttgacccaaatccaccatctgtcacaactttagggtggtgagtctaggttgcaacgtgattctactttagaccgtca…		VmSWEET1.1	257	277	ARE
VmSWEET14	catcccttttcggttttatcactacataatgaatcttcgtaaaaaaatatttttgtgaatttatactaatcgaaagataccaattagttcttggagatacaattttcaaaattatctagcaaataataagagtaaaaatagacatttttttaaggtgtccagagtaaaaaaatatatataatttcatcaagaacatcaactgagatagtatctatatgaatatatcaatcatcttattcttcatcaaccggtcaggcactaataaggaaaattctcagcttaacgaaattaaagaaggaaaactttatcatctctcttttccaccaatattatgcatgcttccaaattccattagtttcacttttttgtatttttgataaaaattagttcccctcaata…		VmSWEET1.1	264	284	CAAT-box
VmSWEET16	atgagtgttttttttgggtaaaattcgtaaaattaaaaattaaaataaaatgagtgttgtatatcctaaattttattttgtgatatatatagcaaaaacgacatgggtgaaaatgccgtaaatacgctccaaataagttgataaaaaaaaaaaaaaaaacagctccaaataactgaattattttacctactttaatcatgtcgtacagttctgcacgtactcctatttttttacaatttgcataggtcgatacgagcttttcaatgggctccacccaaattatgaattgggtaaatttcactgagacccataaattttgccttaataatggataccactccacacatgagaaataacaaatgaacccccgtgtggtttccatgagcatttccacctaat…		VmSWEET1.1	394	414	CAAT-box
			VmSWEET1.1	405	425	CAAT-box
			VmSWEET1.1	436	456	LAMP-element
			VmSWEET1.1	466	486	CAAT-box
			VmSWEET1.1	489	509	A-box
			VmSWEET1.1	489	509	CCGTCC motif
			VmSWEET1.1	489	509	CCGTCC-box
			VmSWEET1.1	493	513	CAAT-box
			VmSWEET1.1	494	514	CAAT-box
			VmSWEET1.1	495	515	CAAT-box
			VmSWEET1.1	531	551	STRE
			VmSWEET1.1	544	564	TATA-box
			VmSWEET1.1	550	570	CAAT-box
			VmSWEET1.1	560	580	CAAT-box
			VmSWEET1.1	568	588	STRE
			VmSWEET1.1	577	597	CAAT-box
			VmSWEET1.1	578	598	CAAT-box
			VmSWEET1.1	582	602	CAAT-box
			VmSWEET1.1	584	604	TATA-box
			VmSWEET1.1	585	605	TATA-box
			VmSWEET1.1	597	617	CAAT-box
			VmSWEET1.1	600	620	CAAT-box
			VmSWEET1.1	617	637	TATA-box
			VmSWEET1.1	618	638	TATA-box
			VmSWEET1.1	619	639	TATA-box
			VmSWEET1.1	641	661	CAAT-box
			VmSWEET1.1	654	674	CAAT-box
			VmSWEET1.1	659	679	AT-rich element
			VmSWEET1.1	667	687	CAAT-box
			VmSWEET1.1	678	698	TATA-box
			VmSWEET1.1	679	699	TATA-box
			VmSWEET1.1	680	700	TATA-box
			VmSWEET1.1	682	702	TATA-box
			VmSWEET1.1	701	721	MBSI
			VmSWEET1.1	710	730	TATA-box
			VmSWEET1.1	711	731	TATA
			VmSWEET1.1	711	731	TATA-box
			VmSWEET1.1	736	756	CAAT-box
			VmSWEET1.1	737	757	CAAT-box
			VmSWEET1.1	771	791	CAAT-box
			VmSWEET1.1	815	835	CAAT-box
			VmSWEET1.1	841	861	AAGAA-motif
			VmSWEET1.1	853	873	CAAT-box
			VmSWEET1.1	855	875	CAAT-box
			VmSWEET1.1	876	896	CAAT-box
			VmSWEET1.1	912	932	WUN-motif
			VmSWEET1.1	917	937	CAAT-box
			VmSWEET1.1	966	986	MYB
			VmSWEET1.1	966	986	MYB-like sequence
			VmSWEET1.1	985	1005	CAAT-box
			VmSWEET1.1	996	1016	CAAT-box
			VmSWEET1.1	1042	1062	CAAT-box
			VmSWEET1.1	1043	1063	CAAT-box
			VmSWEET1.1	1061	1081	AAGAA-motif
			VmSWEET1.1	1085	1105	GATA-motif
			VmSWEET1.1	1104	1124	TCCC-motif
			VmSWEET1.1	1107	1127	GATA-motif
			VmSWEET1.1	1129	1149	STRE
			VmSWEET1.1	1130	1150	GATA-motif
			VmSWEET1.1	1130	1150	I-box
			VmSWEET1.1	1136	1156	CAAT-box
			VmSWEET1.1	1137	1157	CAAT-box
			VmSWEET1.1	1159	1179	CAAT-box
			VmSWEET1.1	1160	1180	CAAT-box
			VmSWEET1.1	1214	1234	TATA-box
			VmSWEET1.1	1215	1235	TATA-box
			VmSWEET1.1	1245	1265	MYB
			VmSWEET1.1	1252	1272	I-box
			VmSWEET1.1	1272	1292	CAAT-box
			VmSWEET1.1	1282	1302	TATA-box
			VmSWEET1.1	1283	1303	TATA-box
			VmSWEET1.1	1284	1304	TATA-box
			VmSWEET1.1	1287	1307	CAAT-box
			VmSWEET1.1	1313	1333	TATA-box
			VmSWEET1.1	1363	1383	CAAT-box
			VmSWEET1.1	1365	1385	CAAT-box
			VmSWEET1.1	1379	1399	MRE
			VmSWEET1.1	1388	1408	TATA-box
			VmSWEET1.1	1415	1435	CAAT-box
			VmSWEET1.1	1443	1463	MYC
			VmSWEET1.1	1465	1485	CAAT-box
			VmSWEET1.1	1492	1512	LTR
			VmSWEET1.1	1521	1541	ATCT-motif
			VmSWEET1.1	1547	1567	MYB
			VmSWEET1.1	1547	1567	MYB-like sequence
			VmSWEET1.1	1616	1636	Box 4
			VmSWEET1.1	1621	1641	O2-site
			VmSWEET1.1	1622	1642	ABRE
			VmSWEET1.1	1622	1642	G-box
			VmSWEET1.1	1624	1644	as-1
			VmSWEET1.1	1624	1644	CGTCA-motif
			VmSWEET1.1	1624	1644	TGACG-motif
			VmSWEET1.1	1642	1662	TCCC-motif
			VmSWEET1.1	1679	1699	GT1-motif
			VmSWEET1.1	1680	1700	GT1-motif
			VmSWEET1.1	1684	1704	STRE
			VmSWEET1.1	1723	1743	Box 4
			VmSWEET1.1	1735	1755	Myb
			VmSWEET1.1	1762	1782	AT~TATA-box
			VmSWEET1.1	1762	1782	TATA-box
			VmSWEET1.1	1763	1783	TATA-box
			VmSWEET1.1	1764	1784	TATA-box
			VmSWEET1.1	1784	1804	CAAT-box
			VmSWEET1.1	1841	1861	MYC
			VmSWEET1.1	1842	1862	CAAT-box
			VmSWEET1.1	1857	1877	ABRE
			VmSWEET1.2	380	420	TCT-motif
			VmSWEET1.2	1037	1077	TCT-motif
			VmSWEET1.2	1750	1790	TCT-motif
			VmSWEET1.2	492	532	ABRE4
			VmSWEET1.2	961	1001	MYB
			VmSWEET1.2	1497	1537	MYB
			VmSWEET1.2	1178	1218	TC-rich repeats
			VmSWEET1.2	635	675	G-Box
			VmSWEET1.2	1541	1581	G-Box
			VmSWEET1.2	10	50	CAAT-box
			VmSWEET1.2	27	67	CAAT-box
			VmSWEET1.2	80	120	CAAT-box
			VmSWEET1.2	103	143	CAAT-box
			VmSWEET1.2	175	215	CAAT-box
			VmSWEET1.2	184	224	CAAT-box
			VmSWEET1.2	203	243	CAAT-box
			VmSWEET1.2	412	452	CAAT-box
			VmSWEET1.2	572	612	CAAT-box
			VmSWEET1.2	657	697	CAAT-box
			VmSWEET1.2	757	797	CAAT-box
			VmSWEET1.2	806	846	CAAT-box
			VmSWEET1.2	839	879	CAAT-box
			VmSWEET1.2	974	1014	CAAT-box
			VmSWEET1.2	987	1027	CAAT-box
			VmSWEET1.2	1176	1216	CAAT-box
			VmSWEET1.2	1187	1227	CAAT-box
			VmSWEET1.2	1266	1306	CAAT-box
			VmSWEET1.2	1273	1313	CAAT-box
			VmSWEET1.2	1278	1318	CAAT-box
			VmSWEET1.2	1392	1432	CAAT-box
			VmSWEET1.2	1393	1433	CAAT-box
			VmSWEET1.2	1427	1467	CAAT-box
			VmSWEET1.2	1451	1491	CAAT-box
			VmSWEET1.2	1460	1500	CAAT-box
			VmSWEET1.2	1487	1527	CAAT-box
			VmSWEET1.2	1497	1537	CAAT-box
			VmSWEET1.2	1619	1659	CAAT-box
			VmSWEET1.2	1652	1692	CAAT-box
			VmSWEET1.2	1711	1751	CAAT-box
			VmSWEET1.2	1714	1754	CAAT-box
			VmSWEET1.2	1764	1804	CAAT-box
			VmSWEET1.2	1891	1931	CAAT-box
			VmSWEET1.2	879	919	CCAAT-box
			VmSWEET1.2	1104	1144	CCAAT-box
			VmSWEET1.2	542	582	WUN-motif
			VmSWEET1.2	1525	1565	O2-site
			VmSWEET1.2	93	133	TATA-box
			VmSWEET1.2	116	156	TATA-box
			VmSWEET1.2	121	161	TATA-box
			VmSWEET1.2	122	162	TATA-box
			VmSWEET1.2	123	163	TATA-box
			VmSWEET1.2	124	164	TATA-box
			VmSWEET1.2	246	286	TATA-box
			VmSWEET1.2	247	287	TATA-box
			VmSWEET1.2	248	288	TATA-box
			VmSWEET1.2	249	289	TATA-box
			VmSWEET1.2	739	779	TATA-box
			VmSWEET1.2	740	780	TATA-box
			VmSWEET1.2	741	781	TATA-box
			VmSWEET1.2	1112	1152	TATA-box
			VmSWEET1.2	1113	1153	TATA-box
			VmSWEET1.2	1423	1463	TATA-box
			VmSWEET1.2	1424	1464	TATA-box
			VmSWEET1.2	1639	1679	TATA-box
			VmSWEET1.2	1661	1701	TATA-box
			VmSWEET1.2	1662	1702	TATA-box
			VmSWEET1.2	1759	1799	TATA-box
			VmSWEET1.2	1784	1824	TATA-box
			VmSWEET1.2	1785	1825	TATA-box
			VmSWEET1.2	1786	1826	TATA-box
			VmSWEET1.2	144	184	as-1
			VmSWEET1.2	569	609	as-1
			VmSWEET1.2	1572	1612	as-1
			VmSWEET1.2	1708	1748	as-1
			VmSWEET1.2	480	520	LTR
			VmSWEET1.2	1883	1923	LTR
			VmSWEET1.2	492	532	ABRE3a
			VmSWEET1.2	26	66	MYC
			VmSWEET1.2	184	224	MYC
			VmSWEET1.2	1272	1312	MYC
			VmSWEET1.2	1079	1119	AT-rich sequence
			VmSWEET1.2	896	936	DRE1
			VmSWEET1.2	221	261	ARE
			VmSWEET1.2	229	269	ARE
			VmSWEET1.2	243	283	ARE
			VmSWEET1.2	1307	1347	ARE
			VmSWEET1.2	1389	1429	ARE
			VmSWEET1.2	701	741	CAT-box
			VmSWEET1.2	961	1001	Myb-binding site
			VmSWEET1.2	1168	1208	AT-rich element
			VmSWEET1.2	492	532	G-box
			VmSWEET1.2	916	956	G-box
			VmSWEET1.2	1550	1590	G-box
			VmSWEET1.2	1718	1758	chs-CMA2a
			VmSWEET1.2	492	532	ABRE
			VmSWEET1.2	636	676	ABRE
			VmSWEET1.2	1541	1581	ABRE
			VmSWEET1.2	120	160	TATA
			VmSWEET1.2	651	691	Myc
			VmSWEET1.2	1035	1075	Myc
			VmSWEET1.2	879	919	MYB recognition site
			VmSWEET1.2	1104	1144	MYB recognition site
			VmSWEET1.2	797	837	ERE
			VmSWEET1.2	1077	1117	ERE
			VmSWEET1.2	1054	1094	MRE
			VmSWEET1.2	1784	1824	AT~TATA-box
			VmSWEET1.2	144	184	TGACG-motif
			VmSWEET1.2	569	609	TGACG-motif
			VmSWEET1.2	1572	1612	TGACG-motif
			VmSWEET1.2	1708	1748	TGACG-motif
			VmSWEET1.2	144	184	CGTCA-motif
			VmSWEET1.2	569	609	CGTCA-motif
			VmSWEET1.2	1572	1612	CGTCA-motif
			VmSWEET1.2	1708	1748	CGTCA-motif
			VmSWEET2.1	22	42	as-1
			VmSWEET2.1	22	42	CGTCA-motif
			VmSWEET2.1	22	42	TGACG-motif
			VmSWEET2.1	42	62	TATA-box
			VmSWEET2.1	43	63	TATA-box
			VmSWEET2.1	44	64	TATA-box
			VmSWEET2.1	60	80	CAAT-box
			VmSWEET2.1	126	146	CAAT-box
			VmSWEET2.1	126	146	MYC
			VmSWEET2.1	144	164	CAAT-box
			VmSWEET2.1	153	173	TCA-element
			VmSWEET2.1	163	183	CAAT-box
			VmSWEET2.1	184	204	circadian
			VmSWEET2.1	210	230	TATA-box
			VmSWEET2.1	240	260	TATA-box
			VmSWEET2.1	248	268	WUN-motif
			VmSWEET2.1	264	284	CAAT-box
			VmSWEET2.1	264	284	MYC
			VmSWEET2.1	284	304	CAAT-box
			VmSWEET2.1	311	331	CAAT-box
			VmSWEET2.1	417	437	CAAT-box
			VmSWEET2.1	428	448	CAAT-box
			VmSWEET2.1	439	459	TATA-box
			VmSWEET2.1	473	493	CAAT-box
			VmSWEET2.1	478	498	CAAT-box
			VmSWEET2.1	479	499	CAAT-box
			VmSWEET2.1	527	547	CAAT-box
			VmSWEET2.1	530	550	TATA-box
			VmSWEET2.1	549	569	CAAT-box
			VmSWEET2.1	555	575	CAAT-box
			VmSWEET2.1	592	612	TC-rich repeats
			VmSWEET2.1	604	624	Myb
			VmSWEET2.1	633	653	CAAT-box
			VmSWEET2.1	635	655	ARE
			VmSWEET2.1	641	661	MBS
			VmSWEET2.1	641	661	Myb
			VmSWEET2.1	653	673	CAAT-box
			VmSWEET2.1	677	697	CAAT-box
			VmSWEET2.1	678	698	CAAT-box
			VmSWEET2.1	680	700	TATA
			VmSWEET2.1	681	701	TATA-box
			VmSWEET2.1	682	702	TATA-box
			VmSWEET2.1	683	703	TATA-box
			VmSWEET2.1	684	704	TATA-box
			VmSWEET2.1	691	711	CAAT-box
			VmSWEET2.1	702	722	WUN-motif
			VmSWEET2.1	712	732	TATA-box
			VmSWEET2.1	713	733	TATA-box
			VmSWEET2.1	742	762	MBS
			VmSWEET2.1	742	762	Myb
			VmSWEET2.1	760	780	TATA-box
			VmSWEET2.1	772	792	CAAT-box
			VmSWEET2.1	776	796	CAAT-box
			VmSWEET2.1	781	801	TC-rich repeats
			VmSWEET2.1	791	811	CAAT-box
			VmSWEET2.1	811	831	CAAT-box
			VmSWEET2.1	815	835	CAAT-box
			VmSWEET2.1	820	840	ARE
			VmSWEET2.1	847	867	TATA-box
			VmSWEET2.1	863	883	CAAT-box
			VmSWEET2.1	866	886	MYB
			VmSWEET2.1	866	886	MYB-like sequence
			VmSWEET2.1	867	887	GT1-motif
			VmSWEET2.1	869	889	GT1-motif
			VmSWEET2.1	942	962	TATA-box
			VmSWEET2.1	951	971	chs-Unit 1 m1
			VmSWEET2.1	996	1016	MYC
			VmSWEET2.1	1015	1035	CAAT-box
			VmSWEET2.1	1016	1036	CAAT-box
			VmSWEET2.1	1018	1038	CAAT-box
			VmSWEET2.1	1051	1071	STRE
			VmSWEET2.1	1187	1207	CAAT-box
			VmSWEET2.1	1190	1210	TATA-box
			VmSWEET2.1	1191	1211	TATA-box
			VmSWEET2.1	1202	1222	CAAT-box
			VmSWEET2.1	1203	1223	CAAT-box
			VmSWEET2.1	1214	1234	CAAT-box
			VmSWEET2.1	1215	1235	CAAT-box
			VmSWEET2.1	1267	1287	CAAT-box
			VmSWEET2.1	1271	1291	Box 4
			VmSWEET2.1	1296	1316	Box III
			VmSWEET2.1	1309	1329	CAAT-box
			VmSWEET2.1	1317	1337	CAAT-box
			VmSWEET2.1	1400	1420	STRE
			VmSWEET2.1	1417	1437	CAAT-box
			VmSWEET2.1	1461	1481	CAAT-box
			VmSWEET2.1	1462	1482	CAAT-box
			VmSWEET2.1	1474	1494	GT1-motif
			VmSWEET2.1	1475	1495	MYB
			VmSWEET2.1	1475	1495	MYB-like sequence
			VmSWEET2.1	1484	1504	ABRE
			VmSWEET2.1	1484	1504	G-Box
			VmSWEET2.1	1484	1504	G-box
			VmSWEET2.1	1485	1505	ABRE
			VmSWEET2.1	1548	1568	ARE
			VmSWEET2.1	1624	1644	ABRE
			VmSWEET2.1	1626	1646	ABRE
			VmSWEET2.1	1626	1646	G-Box
			VmSWEET2.1	1626	1646	G-box
			VmSWEET2.1	1627	1647	ABRE
			VmSWEET2.1	1630	1650	AAGAA-motif
			VmSWEET2.1	1652	1672	Myb
			VmSWEET2.1	1715	1735	CAAT-box
			VmSWEET2.1	1730	1750	CAAT-box
			VmSWEET2.1	1738	1758	AuxRR-core
			VmSWEET2.1	1746	1766	CAAT-box
			VmSWEET2.1	1782	1802	Myb
			VmSWEET2.1	1798	1818	MSA-like
			VmSWEET2.1	1882	1902	Box 4
			VmSWEET2.1	1888	1908	CAAT-box
			VmSWEET2.1	1928	1948	GT1-motif
			VmSWEET2.1	1963	1983	CAAT-box
			VmSWEET2.1	1969	1989	MYB
			VmSWEET2.1	1976	1996	TATA-box
			VmSWEET2.2	72	92	GATA-motif
			VmSWEET2.2	85	105	TATC-box
			VmSWEET2.2	132	152	CAAT-box
			VmSWEET2.2	134	154	ARE
			VmSWEET2.2	140	160	CAAT-box
			VmSWEET2.2	164	184	CAAT-box
			VmSWEET2.2	197	217	AT~TATA-box
			VmSWEET2.2	199	219	AT~TATA-box
			VmSWEET2.2	201	221	AT~TATA-box
			VmSWEET2.2	203	223	AT~TATA-box
			VmSWEET2.2	205	225	AT~TATA-box
			VmSWEET2.2	207	227	AT~TATA-box
			VmSWEET2.2	209	229	AT~TATA-box
			VmSWEET2.2	219	239	CAAT-box
			VmSWEET2.2	339	359	CAAT-box
			VmSWEET2.2	355	375	CAAT-box
			VmSWEET2.2	377	397	CAAT-box
			VmSWEET2.2	389	409	CAAT-box
			VmSWEET2.2	417	437	AE-box
			VmSWEET2.2	422	442	MBS
			VmSWEET2.2	438	458	CAAT-box
			VmSWEET2.2	443	463	Box 4
			VmSWEET2.2	471	491	CAAT-box
			VmSWEET2.2	561	581	LAMP-element
			VmSWEET2.2	660	680	TCA-element
			VmSWEET2.2	682	702	CAAT-box
			VmSWEET2.2	694	714	CAAT-box
			VmSWEET2.2	704	724	CAAT-box
			VmSWEET2.2	751	771	AT~TATA-box
			VmSWEET2.2	753	773	AT~TATA-box
			VmSWEET2.2	755	775	AT~TATA-box
			VmSWEET2.2	757	777	AT~TATA-box
			VmSWEET2.2	759	779	AT~TATA-box
			VmSWEET2.2	761	781	AT~TATA-box
			VmSWEET2.2	763	783	AT~TATA-box
			VmSWEET2.2	765	785	AT~TATA-box
			VmSWEET2.2	767	787	AT~TATA-box
			VmSWEET2.2	769	789	AT~TATA-box
			VmSWEET2.2	817	837	CAAT-box
			VmSWEET2.2	844	864	AT~TATA-box
			VmSWEET2.2	867	887	CAAT-box
			VmSWEET2.2	877	897	CAAT-box
			VmSWEET2.2	885	905	CAAT-box
			VmSWEET2.2	905	925	MBS
			VmSWEET2.2	923	943	Box 4
			VmSWEET2.2	1008	1028	CAAT-box
			VmSWEET2.2	1018	1038	ABRE
			VmSWEET2.2	1043	1063	ABRE
			VmSWEET2.2	1045	1065	ABRE
			VmSWEET2.2	1069	1089	CAAT-box
			VmSWEET2.2	1099	1119	ARE
			VmSWEET2.2	1173	1193	CAAT-box
			VmSWEET2.2	1198	1218	CAAT-box
			VmSWEET2.2	1286	1306	CAAT-box
			VmSWEET2.2	1334	1354	CAAT-box
			VmSWEET2.2	1359	1379	CAAT-box
			VmSWEET2.2	1371	1391	CAAT-box
			VmSWEET2.2	1404	1424	DRE
			VmSWEET2.2	1437	1457	CAAT-box
			VmSWEET2.2	1444	1464	CAAT-box
			VmSWEET2.2	1446	1466	CAAT-box
			VmSWEET2.2	1478	1498	CAAT-box
			VmSWEET2.2	1504	1524	CAAT-box
			VmSWEET2.2	1529	1549	CAAT-box
			VmSWEET2.2	1558	1578	CAAT-box
			VmSWEET2.2	1560	1580	CAAT-box
			VmSWEET2.2	1567	1587	CAAT-box
			VmSWEET2.2	1587	1607	CAAT-box
			VmSWEET2.2	1660	1680	CAAT-box
			VmSWEET2.2	1680	1700	CAAT-box
			VmSWEET2.2	1687	1707	CAAT-box
			VmSWEET2.2	1695	1715	CAAT-box
			VmSWEET2.2	1715	1735	CAAT-box
			VmSWEET2.2	1718	1738	CAAT-box
			VmSWEET2.2	1746	1766	as-1
			VmSWEET2.2	1746	1766	CGTCA-motif
			VmSWEET2.2	1746	1766	TGACG-motif
			VmSWEET2.2	1761	1781	F-box
			VmSWEET2.2	1780	1800	CAAT-box
			VmSWEET2.2	1850	1870	Box 4
			VmSWEET2.2	1922	1942	DRE1
			VmSWEET2.2	1965	1985	CAAT-box
			VmSWEET2.2	1984	2004	CAAT-box
			VmSWEET3	2	22	MYB
			VmSWEET3	2	22	MYB-like sequence
			VmSWEET3	19	39	CAAT-box
			VmSWEET3	27	47	STRE
			VmSWEET3	72	92	dOCT
			VmSWEET3	106	126	CAAT-box
			VmSWEET3	123	143	CAAT-box
			VmSWEET3	128	148	MYC
			VmSWEET3	177	197	CAAT-box
			VmSWEET3	211	231	CAAT-box
			VmSWEET3	255	275	ABRE
			VmSWEET3	255	275	G-box
			VmSWEET3	300	320	CAAT-box
			VmSWEET3	310	330	TATA-box
			VmSWEET3	366	386	MYB
			VmSWEET3	366	386	MYB-like sequence
			VmSWEET3	369	389	CAAT-box
			VmSWEET3	370	390	CAAT-box
			VmSWEET3	372	392	GA-motif
			VmSWEET3	409	429	TATA-box
			VmSWEET3	410	430	TATA-box
			VmSWEET3	432	452	MYC
			VmSWEET3	433	453	CAAT-box
			VmSWEET3	443	463	TATA-box
			VmSWEET3	444	464	TATA-box
			VmSWEET3	458	478	CTAG-motif
			VmSWEET3	526	546	CAAT-box
			VmSWEET3	536	556	TATA-box
			VmSWEET3	538	558	TATA-box
			VmSWEET3	545	565	CAAT-box
			VmSWEET3	570	590	WUN-motif
			VmSWEET3	681	701	LTR
			VmSWEET3	690	710	ARE
			VmSWEET3	720	740	GT1-motif
			VmSWEET3	754	774	AAGAA-motif
			VmSWEET3	770	790	STRE
			VmSWEET3	844	864	CAAT-box
			VmSWEET3	879	899	CAAT-box
			VmSWEET3	888	908	CAAT-box
			VmSWEET3	904	924	ABRE
			VmSWEET3	906	926	ABRE
			VmSWEET3	906	926	ABRE3a
			VmSWEET3	906	926	ABRE4
			VmSWEET3	906	926	G-box
			VmSWEET3	916	936	TATA-box
			VmSWEET3	952	972	TC-rich repeats
			VmSWEET3	990	1010	CAAT-box
			VmSWEET3	1003	1023	CAAT-box
			VmSWEET3	1022	1042	WUN-motif
			VmSWEET3	1044	1064	CAAT-box
			VmSWEET3	1047	1067	CAAT-box
			VmSWEET3	1083	1103	TCA
			VmSWEET3	1106	1126	CAAT-box
			VmSWEET3	1159	1179	CAAT-box
			VmSWEET3	1159	1179	MYC
			VmSWEET3	1161	1181	CAAT-box
			VmSWEET3	1167	1187	CAAT-box
			VmSWEET3	1177	1197	TATA-box
			VmSWEET3	1197	1217	STRE
			VmSWEET3	1206	1226	GARE-motif
			VmSWEET3	1206	1226	MYB
			VmSWEET3	1206	1226	Myb-binding site
			VmSWEET3	1242	1262	CAAT-box
			VmSWEET3	1265	1285	CAAT-box
			VmSWEET3	1266	1286	CAAT-box
			VmSWEET3	1271	1291	CAAT-box
			VmSWEET3	1279	1299	TATA-box
			VmSWEET3	1306	1326	AAGAA-motif
			VmSWEET3	1313	1333	TCA
			VmSWEET3	1403	1423	CAAT-box
			VmSWEET3	1429	1449	CAAT-box
			VmSWEET3	1443	1463	TCT-motif
			VmSWEET3	1473	1493	CAAT-box
			VmSWEET3	1475	1495	Box 4
			VmSWEET3	1499	1519	AAGAA-motif
			VmSWEET3	1552	1572	MYC
			VmSWEET3	1602	1622	MYB
			VmSWEET3	1647	1667	MYC
			VmSWEET3	1670	1690	CAAT-box
			VmSWEET3	1671	1691	CAAT-box
			VmSWEET3	1695	1715	MYC
			VmSWEET3	1696	1716	CAAT-box
			VmSWEET3	1722	1742	TATA-box
			VmSWEET3	1743	1763	MYC
			VmSWEET3	1766	1786	CAAT-box
			VmSWEET3	1776	1796	CAAT-box
			VmSWEET3	1777	1797	CAAT-box
			VmSWEET3	1894	1914	CAAT-box
			VmSWEET3	1930	1950	TATA-box
			VmSWEET3	1931	1951	TATA-box
			VmSWEET3	1932	1952	TATA-box
			VmSWEET3	1933	1953	TATA-box
			VmSWEET3	1934	1954	TATA-box
			VmSWEET3	1937	1957	CTAG-motif
			VmSWEET4	14	34	CAAT-box
			VmSWEET4	104	124	CAAT-box
			VmSWEET4	132	152	CAAT-box
			VmSWEET4	143	163	GT1-motif
			VmSWEET4	173	193	TATA-box
			VmSWEET4	174	194	TATA-box
			VmSWEET4	177	197	CAAT-box
			VmSWEET4	194	214	Myb
			VmSWEET4	237	257	TATA-box
			VmSWEET4	239	259	AT~TATA-box
			VmSWEET4	239	259	TATA-box
			VmSWEET4	240	260	TATA-box
			VmSWEET4	241	261	TATA-box
			VmSWEET4	319	339	ARE
			VmSWEET4	371	391	CAAT-box
			VmSWEET4	416	436	TATA-box
			VmSWEET4	422	442	circadian
			VmSWEET4	422	442	TATA-box
			VmSWEET4	464	484	TCA
			VmSWEET4	474	494	TGA-element
			VmSWEET4	489	509	MYC
			VmSWEET4	505	525	CAAT-box
			VmSWEET4	646	666	CAAT-box
			VmSWEET4	687	707	CAAT-box
			VmSWEET4	688	708	CAAT-box
			VmSWEET4	717	737	CAAT-box
			VmSWEET4	770	790	MYB
			VmSWEET4	781	801	TATA-box
			VmSWEET4	854	874	DRE core
			VmSWEET4	869	889	MYC
			VmSWEET4	926	946	CAAT-box
			VmSWEET4	951	971	CAAT-box
			VmSWEET4	965	985	Box 4
			VmSWEET4	969	989	CAAT-box
			VmSWEET4	992	1012	TATA-box
			VmSWEET4	993	1013	TATA-box
			VmSWEET4	994	1014	TATA-box
			VmSWEET4	1016	1036	TCA
			VmSWEET4	1083	1103	Box 4
			VmSWEET4	1087	1107	CAAT-box
			VmSWEET4	1102	1122	STRE
			VmSWEET4	1138	1158	CAAT-box
			VmSWEET4	1149	1169	TCCC-motif
			VmSWEET4	1171	1191	CAAT-box
			VmSWEET4	1187	1207	TATA-box
			VmSWEET4	1200	1220	CAAT-box
			VmSWEET4	1225	1245	GATA-motif
			VmSWEET4	1233	1253	CAAT-box
			VmSWEET4	1233	1253	MYC
			VmSWEET4	1235	1255	CAAT-box
			VmSWEET4	1248	1268	CAAT-box
			VmSWEET4	1273	1293	TATA-box
			VmSWEET4	1274	1294	TATA-box
			VmSWEET4	1303	1323	TATA-box
			VmSWEET4	1309	1329	CAAT-box
			VmSWEET4	1348	1368	CAAT-box
			VmSWEET4	1351	1371	ARE
			VmSWEET4	1359	1379	ARE
			VmSWEET4	1365	1385	CAAT-box
			VmSWEET4	1370	1390	CAAT-box
			VmSWEET4	1376	1396	ARE
			VmSWEET4	1392	1412	CAAT-box
			VmSWEET4	1405	1425	MYC
			VmSWEET4	1406	1426	CAAT-box
			VmSWEET4	1416	1436	LTR
			VmSWEET4	1426	1446	TATA-box
			VmSWEET4	1431	1451	MRE
			VmSWEET4	1472	1492	TATA
			VmSWEET4	1472	1492	TATA-box
			VmSWEET4	1520	1540	ARE
			VmSWEET4	1528	1548	ARE
			VmSWEET4	1538	1558	ARE
			VmSWEET4	1541	1561	CAAT-box
			VmSWEET4	1542	1562	CAAT-box
			VmSWEET4	1553	1573	LTR
			VmSWEET4	1557	1577	ARE
			VmSWEET4	1565	1585	ARE
			VmSWEET4	1568	1588	CAAT-box
			VmSWEET4	1569	1589	CAAT-box
			VmSWEET4	1573	1593	ARE
			VmSWEET4	1576	1596	CAAT-box
			VmSWEET4	1577	1597	CAAT-box
			VmSWEET4	1579	1599	CAAT-box
			VmSWEET4	1582	1602	ARE
			VmSWEET4	1603	1623	TATA-box
			VmSWEET4	1628	1648	TATA
			VmSWEET4	1629	1649	TATA-box
			VmSWEET4	1630	1650	TATA-box
			VmSWEET4	1631	1651	TATA-box
			VmSWEET4	1632	1652	TATA-box
			VmSWEET4	1686	1706	LTR
			VmSWEET4	1697	1717	CAAT-box
			VmSWEET4	1697	1717	MYC
			VmSWEET4	1711	1731	CAAT-box
			VmSWEET4	1730	1750	CAAT-box
			VmSWEET4	1738	1758	CAAT-box
			VmSWEET4	1739	1759	CAAT-box
			VmSWEET4	1743	1763	ARE
			VmSWEET4	1751	1771	ARE
			VmSWEET4	1755	1775	CAAT-box
			VmSWEET4	1774	1794	STRE
			VmSWEET4	1778	1798	TATA-box
			VmSWEET4	1784	1804	TATA-box
			VmSWEET4	1869	1889	CAAT-box
			VmSWEET4	1927	1947	MYB
			VmSWEET4	1927	1947	Myb-binding site
			VmSWEET4	1942	1962	CAAT-box
			VmSWEET4	1955	1975	TATA-box
			VmSWEET4	1957	1977	TATA-box
			VmSWEET4	1968	1988	LTR
			VmSWEET4	1975	1995	AAGAA-motif
			VmSWEET4	1984	2004	MYB
			VmSWEET4	1984	2004	Myb-binding site
			VmSWEET5	112	132	CAAT-box
			VmSWEET5	112	132	HD-Zip 1
			VmSWEET5	117	137	CAAT-box
			VmSWEET5	126	146	CAAT-box
			VmSWEET5	128	148	MYB
			VmSWEET5	128	148	MYB-like sequence
			VmSWEET5	139	159	CAAT-box
			VmSWEET5	162	182	CAAT-box
			VmSWEET5	188	208	CAAT-box
			VmSWEET5	189	209	CAAT-box
			VmSWEET5	224	244	ARE
			VmSWEET5	328	348	TATA
			VmSWEET5	328	348	TATA-box
			VmSWEET5	389	409	CAAT-box
			VmSWEET5	390	410	CAAT-box
			VmSWEET5	474	494	TCT-motif
			VmSWEET5	482	502	MYC
			VmSWEET5	483	503	CAAT-box
			VmSWEET5	519	539	CAAT-box
			VmSWEET5	552	572	CAAT-box
			VmSWEET5	562	582	TCA-element
			VmSWEET5	603	623	TATA-box
			VmSWEET5	604	624	TATA-box
			VmSWEET5	607	627	CAAT-box
			VmSWEET5	620	640	CAAT-box
			VmSWEET5	639	659	CAAT-box
			VmSWEET5	650	670	CAAT-box
			VmSWEET5	679	699	AAGAA-motif
			VmSWEET5	717	737	TCT-motif
			VmSWEET5	734	754	STRE
			VmSWEET5	772	792	Myb
			VmSWEET5	777	797	Box 4
			VmSWEET5	781	801	F-box
			VmSWEET5	838	858	TATA-box
			VmSWEET5	839	859	TATA-box
			VmSWEET5	848	868	TATA-box
			VmSWEET5	849	869	TATA-box
			VmSWEET5	850	870	TATA-box
			VmSWEET5	867	887	CAAT-box
			VmSWEET5	1015	1035	MYB
			VmSWEET5	1041	1061	CAAT-box
			VmSWEET5	1063	1083	TATA-box
			VmSWEET5	1084	1104	WUN-motif
			VmSWEET5	1085	1105	WUN-motif
			VmSWEET5	1090	1110	TATA-box
			VmSWEET5	1091	1111	TATA-box
			VmSWEET5	1111	1131	CAAT-box
			VmSWEET5	1114	1134	CAAT-box
			VmSWEET5	1132	1152	CAAT-box
			VmSWEET5	1136	1156	CAAT-box
			VmSWEET5	1141	1161	CAAT-box
			VmSWEET5	1142	1162	CAAT-box
			VmSWEET5	1153	1173	G-box
			VmSWEET5	1153	1173	G-Box
			VmSWEET5	1154	1174	Box II
			VmSWEET5	1154	1174	G-box
			VmSWEET5	1155	1175	ABRE2
			VmSWEET5	1156	1176	ABRE
			VmSWEET5	1156	1176	G-box
			VmSWEET5	1156	1176	G-Box
			VmSWEET5	1157	1177	ABRE
			VmSWEET5	1182	1202	ABRE
			VmSWEET5	1182	1202	G-box
			VmSWEET5	1184	1204	as-1
			VmSWEET5	1184	1204	CGTCA-motif
			VmSWEET5	1184	1204	TGACG-motif
			VmSWEET5	1204	1224	CAAT-box
			VmSWEET5	1233	1253	STRE
			VmSWEET5	1258	1278	GT1-motif
			VmSWEET5	1259	1279	GT1-motif
			VmSWEET5	1299	1319	TATA-box
			VmSWEET5	1300	1320	TATA-box
			VmSWEET5	1301	1321	TATA-box
			VmSWEET5	1316	1336	CAAT-box
			VmSWEET5	1330	1350	P-box
			VmSWEET5	1334	1354	STRE
			VmSWEET5	1347	1367	CAAT-box
			VmSWEET5	1357	1377	TATA-box
			VmSWEET5	1358	1378	TATA-box
			VmSWEET5	1431	1451	CAAT-box
			VmSWEET5	1452	1472	MYB
			VmSWEET5	1464	1484	TATA-box
			VmSWEET5	1465	1485	TATA-box
			VmSWEET5	1534	1554	as-1
			VmSWEET5	1534	1554	CGTCA-motif
			VmSWEET5	1534	1554	TGACG-motif
			VmSWEET5	1555	1575	as-1
			VmSWEET5	1555	1575	CGTCA-motif
			VmSWEET5	1555	1575	TGACG-motif
			VmSWEET5	1562	1582	ABRE
			VmSWEET5	1562	1582	G-box
			VmSWEET5	1562	1582	G-Box
			VmSWEET5	1563	1583	ABRE
			VmSWEET5	1586	1606	ABRE
			VmSWEET5	1588	1608	ABRE
			VmSWEET5	1588	1608	G-box
			VmSWEET5	1588	1608	G-Box
			VmSWEET5	1589	1609	ABRE
			VmSWEET5	1601	1621	TATA-box
			VmSWEET5	1602	1622	TATA-box
			VmSWEET5	1603	1623	TATA-box
			VmSWEET5	1605	1625	Myc
			VmSWEET5	1624	1644	CAAT-box
			VmSWEET5	1625	1645	CAAT-box
			VmSWEET5	1625	1645	HD-Zip 1
			VmSWEET5	1630	1650	CAAT-box
			VmSWEET5	1644	1664	TATA-box
			VmSWEET5	1646	1666	TATA-box
			VmSWEET5	1669	1689	CAAT-box
			VmSWEET5	1676	1696	Myc
			VmSWEET5	1682	1702	CAAT-box
			VmSWEET5	1722	1742	CAT-box
			VmSWEET5	1750	1770	CAAT-box
			VmSWEET5	1765	1785	CAAT-box
			VmSWEET5	1795	1815	TATA-box
			VmSWEET5	1796	1816	TATA-box
			VmSWEET5	1807	1827	CAAT-box
			VmSWEET5	1829	1849	CCAAT-box
			VmSWEET5	1829	1849	MYB recognition site
			VmSWEET5	1875	1895	F-box
			VmSWEET5	1882	1902	CAAT-box
			VmSWEET5	1884	1904	Box 4
			VmSWEET5	1891	1911	CAAT-box
			VmSWEET5	1898	1918	CAAT-box
			VmSWEET5	1924	1944	CAAT-box
			VmSWEET5	1930	1950	MYB
			VmSWEET5	1930	1950	MYB-like sequence
			VmSWEET5	1949	1969	CAAT-box
			VmSWEET5	1981	2001	CAAT-box
			VmSWEET5	1988	2008	TATA-box
			VmSWEET5	1990	2010	TATA-box
			VmSWEET10.1	41	61	STRE
			VmSWEET10.1	108	128	STRE
			VmSWEET10.1	134	154	CAAT-box
			VmSWEET10.1	147	167	P-box
			VmSWEET10.1	237	257	I-box
			VmSWEET10.1	267	287	CAAT-box
			VmSWEET10.1	268	288	CAAT-box
			VmSWEET10.1	312	332	Box 4
			VmSWEET10.1	324	344	CAAT-box
			VmSWEET10.1	325	345	CAAT-box
			VmSWEET10.1	346	366	GARE-motif
			VmSWEET10.1	347	367	MYB
			VmSWEET10.1	347	367	Myb-binding site
			VmSWEET10.1	369	389	chs-CMA1a
			VmSWEET10.1	465	485	Myb
			VmSWEET10.1	497	517	TGA-element
			VmSWEET10.1	537	557	CAAT-box
			VmSWEET10.1	546	566	TCT-motif
			VmSWEET10.1	547	567	Myc
			VmSWEET10.1	636	656	CAAT-box
			VmSWEET10.1	732	752	TATA-box
			VmSWEET10.1	815	835	Box 4
			VmSWEET10.1	847	867	ATCT-motif
			VmSWEET10.1	856	876	CAAT-box
			VmSWEET10.1	857	877	CAAT-box
			VmSWEET10.1	922	942	MBS
			VmSWEET10.1	922	942	Myb
			VmSWEET10.1	961	981	CAAT-box
			VmSWEET10.1	1045	1065	CAAT-box
			VmSWEET10.1	1046	1066	CAAT-box
			VmSWEET10.1	1061	1081	MYB
			VmSWEET10.1	1062	1082	AC-I
			VmSWEET10.1	1097	1117	CAAT-box
			VmSWEET10.1	1115	1135	MRE
			VmSWEET10.1	1151	1171	ARE
			VmSWEET10.1	1163	1183	CARE
			VmSWEET10.1	1183	1203	CAAT-box
			VmSWEET10.1	1184	1204	CAAT-box
			VmSWEET10.1	1184	1204	MYC
			VmSWEET10.1	1186	1206	CAAT-box
			VmSWEET10.1	1249	1269	CAAT-box
			VmSWEET10.1	1305	1325	CAAT-box
			VmSWEET10.1	1308	1328	CAAT-box
			VmSWEET10.1	1318	1338	CAAT-box
			VmSWEET10.1	1324	1344	CAAT-box
			VmSWEET10.1	1343	1363	TATA-box
			VmSWEET10.1	1347	1367	TATA-box
			VmSWEET10.1	1354	1374	CAAT-box
			VmSWEET10.1	1391	1411	MBS
			VmSWEET10.1	1391	1411	Myb
			VmSWEET10.1	1401	1421	CAAT-box
			VmSWEET10.1	1413	1433	A-box
			VmSWEET10.1	1413	1433	CCGTCC motif
			VmSWEET10.1	1413	1433	CCGTCC-box
			VmSWEET10.1	1417	1437	CAAT-box
			VmSWEET10.1	1418	1438	CAAT-box
			VmSWEET10.1	1419	1439	CAAT-box
			VmSWEET10.1	1433	1453	AAGAA-motif
			VmSWEET10.1	1461	1481	CAAT-box
			VmSWEET10.1	1490	1510	CAAT-box
			VmSWEET10.1	1492	1512	CAAT-box
			VmSWEET10.1	1505	1525	CAAT-box
			VmSWEET10.1	1506	1526	CAAT-box
			VmSWEET10.1	1541	1561	CAAT-box
			VmSWEET10.1	1563	1583	TATA
			VmSWEET10.1	1564	1584	TATA-box
			VmSWEET10.1	1565	1585	TATA-box
			VmSWEET10.1	1566	1586	TATA-box
			VmSWEET10.1	1567	1587	TATA-box
			VmSWEET10.1	1569	1589	MBSI
			VmSWEET10.1	1593	1613	TATA-box
			VmSWEET10.1	1596	1616	TATA-box
			VmSWEET10.1	1598	1618	TATA-box
			VmSWEET10.1	1611	1631	CAAT-box
			VmSWEET10.1	1637	1657	CAAT-box
			VmSWEET10.1	1661	1681	CAAT-box
			VmSWEET10.1	1677	1697	CAAT-box
			VmSWEET10.1	1696	1716	CAAT-box
			VmSWEET10.1	1709	1729	STRE
			VmSWEET10.1	1728	1748	CAAT-box
			VmSWEET10.1	1746	1766	STRE
			VmSWEET10.1	1767	1787	P-box
			VmSWEET10.1	1781	1801	CAAT-box
			VmSWEET10.1	1783	1803	CAAT-box
			VmSWEET10.1	1818	1838	CAAT-box
			VmSWEET10.1	1836	1856	CAAT-box
			VmSWEET10.1	1875	1895	TCA
			VmSWEET10.1	1894	1914	STRE
			VmSWEET10.1	1896	1916	TATA-box
			VmSWEET10.1	1898	1918	AT~TATA-box
			VmSWEET10.1	1898	1918	TATA-box
			VmSWEET10.1	1899	1919	TATA-box
			VmSWEET10.1	1900	1920	TATA-box
			VmSWEET10.1	1912	1932	CAAT-box
			VmSWEET10.1	1936	1956	AP-1
			VmSWEET10.1	1939	1959	TC-rich repeats
			VmSWEET10.1	1958	1978	Gap-box
			VmSWEET10.1	1962	1982	MYC
			VmSWEET10.1	1963	1983	CAAT-box
			VmSWEET10.1	1976	1996	TATA-box
			VmSWEET10.1	1977	1997	TATA-box
			VmSWEET10.1	1986	2006	STRE
			VmSWEET10.2	2	22	ERE
			VmSWEET10.2	10	30	AAGAA-motif
			VmSWEET10.2	27	47	TATA-box
			VmSWEET10.2	28	48	TATA-box
			VmSWEET10.2	29	49	TATA-box
			VmSWEET10.2	58	78	TATA-box
			VmSWEET10.2	69	89	CAAT-box
			VmSWEET10.2	143	163	CAAT-box
			VmSWEET10.2	170	190	STRE
			VmSWEET10.2	181	201	CAAT-box
			VmSWEET10.2	194	214	CAAT-box
			VmSWEET10.2	195	215	CAAT-box
			VmSWEET10.2	232	252	CAAT-box
			VmSWEET10.2	237	257	CAAT-box
			VmSWEET10.2	239	259	CAAT-box
			VmSWEET10.2	244	264	CAAT-box
			VmSWEET10.2	245	265	WUN-motif
			VmSWEET10.2	264	284	MYB
			VmSWEET10.2	321	341	GT1-motif
			VmSWEET10.2	338	358	MBS
			VmSWEET10.2	338	358	Myb
			VmSWEET10.2	382	402	CAAT-box
			VmSWEET10.2	400	420	CAAT-box
			VmSWEET10.2	417	437	CAAT-box
			VmSWEET10.2	421	441	TATA-box
			VmSWEET10.2	471	491	as-1
			VmSWEET10.2	471	491	CGTCA-motif
			VmSWEET10.2	471	491	TGACG-motif
			VmSWEET10.2	498	518	MYC
			VmSWEET10.2	499	519	CAAT-box
			VmSWEET10.2	508	528	CAAT-box
			VmSWEET10.2	543	563	LTR
			VmSWEET10.2	550	570	TATA-box
			VmSWEET10.2	551	571	TATA-box
			VmSWEET10.2	624	644	GT1-motif
			VmSWEET10.2	632	652	CAAT-box
			VmSWEET10.2	637	657	TATA-box
			VmSWEET10.2	672	692	CAAT-box
			VmSWEET10.2	758	778	CAAT-box
			VmSWEET10.2	772	792	STRE
			VmSWEET10.2	858	878	MYB
			VmSWEET10.2	858	878	MYB-like sequence
			VmSWEET10.2	888	908	ARE
			VmSWEET10.2	893	913	MYB
			VmSWEET10.2	902	922	CAAT-box
			VmSWEET10.2	922	942	CAAT-box
			VmSWEET10.2	924	944	ARE
			VmSWEET10.2	932	952	MYB
			VmSWEET10.2	932	952	MYB-like sequence
			VmSWEET10.2	967	987	ABRE
			VmSWEET10.2	967	987	ABRE3a
			VmSWEET10.2	967	987	ABRE4
			VmSWEET10.2	967	987	G-box
			VmSWEET10.2	995	1015	ARE
			VmSWEET10.2	995	1015	CAAT-box
			VmSWEET10.2	999	1019	CARE
			VmSWEET10.2	1007	1027	Box 4
			VmSWEET10.2	1026	1046	TATA-box
			VmSWEET10.2	1027	1047	TATA-box
			VmSWEET10.2	1028	1048	TATA-box
			VmSWEET10.2	1034	1054	CAAT-box
			VmSWEET10.2	1131	1151	MBS
			VmSWEET10.2	1131	1151	Myb
			VmSWEET10.2	1159	1179	CAAT-box
			VmSWEET10.2	1163	1183	STRE
			VmSWEET10.2	1196	1216	STRE
			VmSWEET10.2	1255	1275	CAAT-box
			VmSWEET10.2	1266	1286	STRE
			VmSWEET10.2	1272	1292	CAAT-box
			VmSWEET10.2	1284	1304	CAAT-box
			VmSWEET10.2	1285	1305	CAAT-box
			VmSWEET10.2	1318	1338	TATA-box
			VmSWEET10.2	1319	1339	TATA-box
			VmSWEET10.2	1320	1340	TATA-box
			VmSWEET10.2	1333	1353	TATA-box
			VmSWEET10.2	1369	1389	LTR
			VmSWEET10.2	1428	1448	RY-element
			VmSWEET10.2	1492	1512	CAAT-box
			VmSWEET10.2	1493	1513	CAAT-box
			VmSWEET10.2	1506	1526	STRE
			VmSWEET10.2	1518	1538	TATA-box
			VmSWEET10.2	1528	1548	CAAT-box
			VmSWEET10.2	1529	1549	CAAT-box
			VmSWEET10.2	1534	1554	CAAT-box
			VmSWEET10.2	1537	1557	TATA-box
			VmSWEET10.2	1546	1566	E2Fb
			VmSWEET10.2	1570	1590	CAAT-box
			VmSWEET10.2	1570	1590	MYC
			VmSWEET10.2	1578	1598	CAAT-box
			VmSWEET10.2	1578	1598	MYC
			VmSWEET10.2	1598	1618	CAAT-box
			VmSWEET10.2	1605	1625	MBS
			VmSWEET10.2	1605	1625	Myb
			VmSWEET10.2	1609	1629	TATA-box
			VmSWEET10.2	1611	1631	TATA-box
			VmSWEET10.2	1627	1647	TATA-box
			VmSWEET10.2	1637	1657	MYC
			VmSWEET10.2	1638	1658	CAAT-box
			VmSWEET10.2	1667	1687	TATA-box
			VmSWEET10.2	1668	1688	TATA-box
			VmSWEET10.2	1669	1689	TATA-box
			VmSWEET10.2	1670	1690	TATA-box
			VmSWEET10.2	1689	1709	CAAT-box
			VmSWEET10.2	1690	1710	CAAT-box
			VmSWEET10.2	1694	1714	TATA-box
			VmSWEET10.2	1697	1717	TATA-box
			VmSWEET10.2	1699	1719	TATA-box
			VmSWEET10.2	1701	1721	TATA-box
			VmSWEET10.2	1708	1728	TATA-box
			VmSWEET10.2	1714	1734	AuxRR-core
			VmSWEET10.2	1720	1740	STRE
			VmSWEET10.2	1842	1862	TATA-box
			VmSWEET10.2	1853	1873	CAAT-box
			VmSWEET10.2	1880	1900	AT~TATA-box
			VmSWEET10.2	1880	1900	TATA-box
			VmSWEET10.2	1881	1901	TATA-box
			VmSWEET10.2	1882	1902	TATA-box
			VmSWEET10.2	1887	1907	STRE
			VmSWEET10.2	1935	1955	CAAT-box
			VmSWEET10.2	1964	1984	AAGAA-motif
			VmSWEET10.2	1977	1997	CAAT-box
			VmSWEET10.2	1982	2002	TATA-box
			VmSWEET10.2	1983	2003	TATA-box
			VmSWEET10.2	1984	2004	TATA-box
			VmSWEET10.2	1985	2005	TATA-box
			VmSWEET12	1	21	ABRE
			VmSWEET12	35	55	CAAT-box
			VmSWEET12	74	94	CAAT-box
			VmSWEET12	75	95	CAAT-box
			VmSWEET12	94	114	G-box
			VmSWEET12	104	124	CAT-box
			VmSWEET12	113	133	Myb
			VmSWEET12	127	147	TCT-motif
			VmSWEET12	139	159	CAAT-box
			VmSWEET12	147	167	TATA-box
			VmSWEET12	164	184	Box 4
			VmSWEET12	168	188	CAAT-box
			VmSWEET12	179	199	CAAT-box
			VmSWEET12	197	217	CAAT-box
			VmSWEET12	208	228	CAAT-box
			VmSWEET12	230	250	CAAT-box
			VmSWEET12	234	254	CAAT-box
			VmSWEET12	234	254	MYC
			VmSWEET12	255	275	TCA-element
			VmSWEET12	269	289	AAGAA-motif
			VmSWEET12	277	297	WUN-motif
			VmSWEET12	297	317	TATC-box
			VmSWEET12	320	340	CAAT-box
			VmSWEET12	415	435	CAAT-box
			VmSWEET12	452	472	CAAT-box
			VmSWEET12	469	489	TATA-box
			VmSWEET12	502	522	TATA-box
			VmSWEET12	510	530	STRE
			VmSWEET12	559	579	CAAT-box
			VmSWEET12	564	584	CAAT-box
			VmSWEET12	564	584	MYC
			VmSWEET12	582	602	CAAT-box
			VmSWEET12	583	603	CAAT-box
			VmSWEET12	595	615	TATA-box
			VmSWEET12	596	616	TATA-box
			VmSWEET12	604	624	CAAT-box
			VmSWEET12	604	624	HD-Zip 1
			VmSWEET12	609	629	CAAT-box
			VmSWEET12	633	653	CAAT-box
			VmSWEET12	646	666	TATA-box
			VmSWEET12	647	667	TATA-box
			VmSWEET12	675	695	MYC
			VmSWEET12	676	696	CAAT-box
			VmSWEET12	697	717	chs-CMA1a
			VmSWEET12	714	734	TATA-box
			VmSWEET12	719	739	CAAT-box
			VmSWEET12	778	798	chs-CMA1a
			VmSWEET12	795	815	TATA-box
			VmSWEET12	800	820	CAAT-box
			VmSWEET12	818	838	TC-rich repeats
			VmSWEET12	843	863	MYC
			VmSWEET12	844	864	CAAT-box
			VmSWEET12	859	879	Box 4
			VmSWEET12	863	883	TATA-box
			VmSWEET12	864	884	TATA-box
			VmSWEET12	865	885	TATA-box
			VmSWEET12	878	898	CAAT-box
			VmSWEET12	909	929	TATA-box
			VmSWEET12	922	942	CAAT-box
			VmSWEET12	960	980	MYC
			VmSWEET12	961	981	CAAT-box
			VmSWEET12	1047	1067	TCT-motif
			VmSWEET12	1063	1083	CAAT-box
			VmSWEET12	1070	1090	CAAT-box
			VmSWEET12	1088	1108	TATA-box
			VmSWEET12	1090	1110	AT~TATA-box
			VmSWEET12	1090	1110	TATA-box
			VmSWEET12	1091	1111	TATA-box
			VmSWEET12	1092	1112	AT~TATA-box
			VmSWEET12	1092	1112	TATA-box
			VmSWEET12	1093	1113	TATA-box
			VmSWEET12	1094	1114	AT~TATA-box
			VmSWEET12	1094	1114	TATA-box
			VmSWEET12	1095	1115	TATA-box
			VmSWEET12	1096	1116	TATA-box
			VmSWEET12	1119	1139	TATA-box
			VmSWEET12	1120	1140	TATA-box
			VmSWEET12	1121	1141	TATA-box
			VmSWEET12	1127	1147	CAAT-box
			VmSWEET12	1186	1206	CAAT-box
			VmSWEET12	1225	1245	TCA-element
			VmSWEET12	1250	1270	CAAT-box
			VmSWEET12	1279	1299	CAAT-box
			VmSWEET12	1300	1320	MYB
			VmSWEET12	1300	1320	Myb-binding site
			VmSWEET12	1343	1363	STRE
			VmSWEET12	1392	1412	CAAT-box
			VmSWEET12	1394	1414	CAAT-box
			VmSWEET12	1430	1450	I-box
			VmSWEET12	1432	1452	GATA-motif
			VmSWEET12	1432	1452	LAMP-element
			VmSWEET12	1445	1465	CAAT-box
			VmSWEET12	1497	1517	CAAT-box
			VmSWEET12	1529	1549	MYC
			VmSWEET12	1536	1556	WUN-motif
			VmSWEET12	1537	1557	WUN-motif
			VmSWEET12	1557	1577	GT1-motif
			VmSWEET12	1573	1593	CAAT-box
			VmSWEET12	1582	1602	ARE
			VmSWEET12	1585	1605	CAAT-box
			VmSWEET12	1586	1606	CAAT-box
			VmSWEET12	1593	1613	TATA-box
			VmSWEET12	1624	1644	AE-box
			VmSWEET12	1632	1652	ARE
			VmSWEET12	1699	1719	as-1
			VmSWEET12	1699	1719	CGTCA-motif
			VmSWEET12	1699	1719	TGACG-motif
			VmSWEET12	1701	1721	TCA
			VmSWEET12	1761	1781	CAAT-box
			VmSWEET12	1785	1805	STRE
			VmSWEET12	1821	1841	CAAT-box
			VmSWEET12	1840	1860	CAAT-box
			VmSWEET12	1845	1865	CAAT-box
			VmSWEET12	1856	1876	GA-motif
			VmSWEET12	1872	1892	CAAT-box
			VmSWEET12	1878	1898	CAAT-box
			VmSWEET12	1886	1906	CAAT-box
			VmSWEET12	1904	1924	CAAT-box
			VmSWEET12	1914	1934	MYC
			VmSWEET12	1940	1960	CAAT-box
			VmSWEET12	1952	1972	AAGAA-motif
			VmSWEET12	1957	1977	TCT-motif
			VmSWEET12	1980	2000	CAAT-box
			VmSWEET13	50	70	Myc
			VmSWEET13	74	94	TATA-box
			VmSWEET13	75	95	TATA-box
			VmSWEET13	76	96	TATA-box
			VmSWEET13	80	100	CAAT-box
			VmSWEET13	100	120	CAAT-box
			VmSWEET13	112	132	ATCT-motif
			VmSWEET13	165	185	TATC-box
			VmSWEET13	193	213	CAAT-box
			VmSWEET13	204	224	AAGAA-motif
			VmSWEET13	214	234	CAAT-box
			VmSWEET13	217	237	TATA-box
			VmSWEET13	225	245	CAAT-box
			VmSWEET13	225	245	MYC
			VmSWEET13	227	247	CAAT-box
			VmSWEET13	297	317	CAAT-box
			VmSWEET13	300	320	CAAT-box
			VmSWEET13	316	336	WUN-motif
			VmSWEET13	321	341	CAAT-box
			VmSWEET13	329	349	CAAT-box
			VmSWEET13	375	395	G-Box
			VmSWEET13	376	396	ABRE
			VmSWEET13	395	415	as-1
			VmSWEET13	395	415	CGTCA-motif
			VmSWEET13	395	415	TGACG-motif
			VmSWEET13	428	448	WUN-motif
			VmSWEET13	438	458	CAAT-box
			VmSWEET13	474	494	CAAT-box
			VmSWEET13	475	495	CAAT-box
			VmSWEET13	488	508	CAAT-box
			VmSWEET13	498	518	MYC
			VmSWEET13	515	535	LTR
			VmSWEET13	561	581	TATA-box
			VmSWEET13	563	583	TATA-box
			VmSWEET13	572	592	MYB
			VmSWEET13	572	592	Myb-binding site
			VmSWEET13	644	664	TATA-box
			VmSWEET13	645	665	TATA-box
			VmSWEET13	646	666	TATA-box
			VmSWEET13	653	673	TATA-box
			VmSWEET13	654	674	AT~TATA-box
			VmSWEET13	654	674	TATA-box
			VmSWEET13	656	676	TATA-box
			VmSWEET13	685	705	CAT-box
			VmSWEET13	730	750	TATA-box
			VmSWEET13	731	751	TATA-box
			VmSWEET13	740	760	GARE-motif
			VmSWEET13	740	760	MYB
			VmSWEET13	740	760	Myb-binding site
			VmSWEET13	754	774	MYB
			VmSWEET13	754	774	Myb-binding site
			VmSWEET13	771	791	CAAT-box
			VmSWEET13	809	829	CAAT-box
			VmSWEET13	817	837	GATA-motif
			VmSWEET13	833	853	STRE
			VmSWEET13	852	872	chs-CMA2a
			VmSWEET13	882	902	TATA-box
			VmSWEET13	883	903	AT~TATA-box
			VmSWEET13	883	903	TATA-box
			VmSWEET13	884	904	TATA-box
			VmSWEET13	885	905	TATA-box
			VmSWEET13	900	920	CAAT-box
			VmSWEET13	915	935	AT~TATA-box
			VmSWEET13	915	935	TATA-box
			VmSWEET13	916	936	TATA-box
			VmSWEET13	917	937	TATA-box
			VmSWEET13	954	974	TATA-box
			VmSWEET13	955	975	AT~TATA-box
			VmSWEET13	955	975	TATA-box
			VmSWEET13	956	976	TATA-box
			VmSWEET13	957	977	AT~TATA-box
			VmSWEET13	957	977	TATA-box
			VmSWEET13	958	978	TATA-box
			VmSWEET13	959	979	TATA-box
			VmSWEET13	961	981	Myc
			VmSWEET13	969	989	CAAT-box
			VmSWEET13	987	1007	DRE core
			VmSWEET13	1024	1044	CAAT-box
			VmSWEET13	1028	1048	ERE
			VmSWEET13	1044	1064	CAAT-box
			VmSWEET13	1074	1094	HD-Zip 3
			VmSWEET13	1088	1108	Box 4
			VmSWEET13	1108	1128	Box 4
			VmSWEET13	1116	1136	TATA-box
			VmSWEET13	1117	1137	TATA-box
			VmSWEET13	1118	1138	TATA-box
			VmSWEET13	1119	1139	TATA-box
			VmSWEET13	1120	1140	TATA-box
			VmSWEET13	1149	1169	AAGAA-motif
			VmSWEET13	1198	1218	ARE
			VmSWEET13	1210	1230	TATA-box
			VmSWEET13	1211	1231	TATA-box
			VmSWEET13	1212	1232	TATA-box
			VmSWEET13	1216	1236	CAAT-box
			VmSWEET13	1272	1292	MBS
			VmSWEET13	1272	1292	Myb
			VmSWEET13	1284	1304	MYB
			VmSWEET13	1284	1304	MYB-like sequence
			VmSWEET13	1287	1307	TATA-box
			VmSWEET13	1288	1308	TATA-box
			VmSWEET13	1310	1330	TATA-box
			VmSWEET13	1312	1332	TATA-box
			VmSWEET13	1326	1346	CAAT-box
			VmSWEET13	1333	1353	CAAT-box
			VmSWEET13	1353	1373	CAAT-box
			VmSWEET13	1445	1465	MYC
			VmSWEET13	1446	1466	CAAT-box
			VmSWEET13	1453	1473	TATA-box
			VmSWEET13	1454	1474	TATA-box
			VmSWEET13	1455	1475	TATA-box
			VmSWEET13	1492	1512	TATA-box
			VmSWEET13	1514	1534	TATA-box
			VmSWEET13	1515	1535	TATA-box
			VmSWEET13	1544	1564	TATA-box
			VmSWEET13	1545	1565	TATA-box
			VmSWEET13	1549	1569	LTR
			VmSWEET13	1557	1577	ABRE
			VmSWEET13	1557	1577	ABRE3a
			VmSWEET13	1557	1577	ABRE4
			VmSWEET13	1557	1577	G-box
			VmSWEET13	1584	1604	CAAT-box
			VmSWEET13	1616	1636	CAAT-box
			VmSWEET13	1618	1638	TATA-box
			VmSWEET13	1619	1639	TATA-box
			VmSWEET13	1620	1640	TATA-box
			VmSWEET13	1642	1662	as-1
			VmSWEET13	1642	1662	CGTCA-motif
			VmSWEET13	1642	1662	TGACG-motif
			VmSWEET13	1679	1699	CAAT-box
			VmSWEET13	1695	1715	GARE-motif
			VmSWEET13	1696	1716	MYB
			VmSWEET13	1696	1716	Myb-binding site
			VmSWEET13	1715	1735	ARE
			VmSWEET13	1760	1780	TATA-box
			VmSWEET13	1761	1781	TATA-box
			VmSWEET13	1780	1800	CAAT-box
			VmSWEET13	1793	1813	TATA-box
			VmSWEET13	1830	1850	CAAT-box
			VmSWEET13	1834	1854	TCA-element
			VmSWEET13	1857	1877	TATA-box
			VmSWEET13	1858	1878	TATA-box
			VmSWEET13	1859	1879	TATA-box
			VmSWEET13	1860	1880	TATA-box
			VmSWEET13	1874	1894	CAAT-box
			VmSWEET13	1898	1918	Box 4
			VmSWEET13	1927	1947	MYB
			VmSWEET13	1927	1947	Myb-binding site
			VmSWEE14	8	28	LTR
			VmSWEE14	59	79	TATA-box
			VmSWEE14	60	80	TATA-box
			VmSWEE14	61	81	TATA-box
			VmSWEE14	62	82	TATA-box
			VmSWEE14	80	100	CAAT-box
			VmSWEE14	81	101	CAAT-box
			VmSWEE14	100	120	CAAT-box
			VmSWEE14	120	140	CAAT-box
			VmSWEE14	172	192	TATA-box
			VmSWEE14	173	193	AT~TATA-box
			VmSWEE14	173	193	TATA-box
			VmSWEE14	174	194	TATA-box
			VmSWEE14	175	195	AT~TATA-box
			VmSWEE14	175	195	TATA-box
			VmSWEE14	176	196	TATA-box
			VmSWEE14	177	197	TATA-box
			VmSWEE14	197	217	MBS
			VmSWEE14	197	217	Myb
			VmSWEE14	213	233	TATA-box
			VmSWEE14	220	240	TATA-box
			VmSWEE14	221	241	TATA-box
			VmSWEE14	226	246	CAAT-box
			VmSWEE14	303	323	LAMP-element
			VmSWEE14	324	344	CAAT-box
			VmSWEE14	325	345	CAAT-box
			VmSWEE14	343	363	CAAT-box
			VmSWEE14	364	384	TATA-box
			VmSWEE14	390	410	STRE
			VmSWEE14	395	415	CAAT-box
			VmSWEE14	407	427	Myb
			VmSWEE14	444	464	TATA-box
			VmSWEE14	469	489	MBS
			VmSWEE14	469	489	Myb
			VmSWEE14	473	493	ARE
			VmSWEE14	488	508	TATA-box
			VmSWEE14	490	510	TATA-box
			VmSWEE14	493	513	CAAT-box
			VmSWEE14	502	522	CAAT-box
			VmSWEE14	509	529	MYC
			VmSWEE14	542	562	TATA-box
			VmSWEE14	546	566	CCAAT-box
			VmSWEE14	546	566	MYB recognition site
			VmSWEE14	573	593	CAAT-box
			VmSWEE14	580	600	as-1
			VmSWEE14	580	600	CGTCA-motif
			VmSWEE14	580	600	TGACG-motif
			VmSWEE14	587	607	CAAT-box
			VmSWEE14	602	622	CAAT-box
			VmSWEE14	621	641	ARE
			VmSWEE14	624	644	CAAT-box
			VmSWEE14	625	645	CAAT-box
			VmSWEE14	630	650	CAAT-box
			VmSWEE14	655	675	TATA-box
			VmSWEE14	663	683	CAAT-box
			VmSWEE14	669	689	A-box
			VmSWEE14	669	689	CCGTCC motif
			VmSWEE14	669	689	CCGTCC-box
			VmSWEE14	683	703	ARE
			VmSWEE14	691	711	TATA-box
			VmSWEE14	692	712	TATA-box
			VmSWEE14	700	720	TATA-box
			VmSWEE14	701	721	TATA-box
			VmSWEE14	728	748	Box 4
			VmSWEE14	744	764	AT~TATA-box
			VmSWEE14	744	764	TATA-box
			VmSWEE14	745	765	TATA-box
			VmSWEE14	746	766	TATA-box
			VmSWEE14	795	815	MYC
			VmSWEE14	796	816	CAAT-box
			VmSWEE14	804	824	MYC
			VmSWEE14	805	825	CAAT-box
			VmSWEE14	820	840	CAAT-box
			VmSWEE14	853	873	CAAT-box
			VmSWEE14	854	874	CAAT-box
			VmSWEE14	855	875	CAAT-box
			VmSWEE14	916	936	TATA-box
			VmSWEE14	917	937	TATA-box
			VmSWEE14	918	938	TATA-box
			VmSWEE14	919	939	TATA-box
			VmSWEE14	945	965	CAAT-box
			VmSWEE14	948	968	TATA-box
			VmSWEE14	949	969	TATA-box
			VmSWEE14	950	970	AT~TATA-box
			VmSWEE14	950	970	TATA-box
			VmSWEE14	952	972	TATA-box
			VmSWEE14	964	984	AuxRR-core
			VmSWEE14	1013	1033	TATA-box
			VmSWEE14	1014	1034	AT~TATA-box
			VmSWEE14	1014	1034	TATA-box
			VmSWEE14	1015	1035	TATA-box
			VmSWEE14	1016	1036	TATA-box
			VmSWEE14	1038	1058	Box 4
			VmSWEE14	1071	1091	Box 4
			VmSWEE14	1076	1096	MYB
			VmSWEE14	1076	1096	MYB-like sequence
			VmSWEE14	1086	1106	TCA-element
			VmSWEE14	1161	1181	CAAT-box
			VmSWEE14	1163	1183	CAAT-box
			VmSWEE14	1182	1202	TATA-box
			VmSWEE14	1195	1215	CAAT-box
			VmSWEE14	1196	1216	CAAT-box
			VmSWEE14	1218	1238	TATA-box
			VmSWEE14	1219	1239	TATA-box
			VmSWEE14	1220	1240	TATA-box
			VmSWEE14	1221	1241	TATA-box
			VmSWEE14	1237	1257	CAAT-box
			VmSWEE14	1250	1270	CAAT-box
			VmSWEE14	1250	1270	MYC
			VmSWEE14	1261	1281	AAGAA-motif
			VmSWEE14	1297	1317	CAAT-box
			VmSWEE14	1308	1328	box S
			VmSWEE14	1337	1357	I-box
			VmSWEE14	1338	1358	O2-site
			VmSWEE14	1354	1374	TATA-box
			VmSWEE14	1355	1375	TATA-box
			VmSWEE14	1390	1410	TGA-element
			VmSWEE14	1410	1430	TATA-box
			VmSWEE14	1421	1441	LTR
			VmSWEE14	1447	1467	TATA-box
			VmSWEE14	1449	1469	TATA-box
			VmSWEE14	1491	1511	TATA-box
			VmSWEE14	1514	1534	CAAT-box
			VmSWEE14	1515	1535	CAAT-box
			VmSWEE14	1519	1539	CAAT-box
			VmSWEE14	1547	1567	CAAT-box
			VmSWEE14	1558	1578	TATA-box
			VmSWEE14	1562	1582	CAAT-box
			VmSWEE14	1570	1590	STRE
			VmSWEE14	1680	1700	CAAT-box
			VmSWEE14	1685	1705	TGA-element
			VmSWEE14	1728	1748	MYC
			VmSWEE14	1729	1749	CAAT-box
			VmSWEE14	1787	1807	TATA-box
			VmSWEE14	1788	1808	TATA-box
			VmSWEE14	1789	1809	TATA-box
			VmSWEE14	1846	1866	CAAT-box
			VmSWEE14	1865	1885	CAAT-box
			VmSWEE14	1866	1886	CAAT-box
			VmSWEE14	1902	1922	LTR
			VmSWEE14	1922	1942	TATA-box
			VmSWEE14	1957	1977	CAAT-box
			VmSWEE14	1984	2004	TATA-box
			VmSWEE16	58	78	TATA-box
			VmSWEE16	60	80	TATA-box
			VmSWEE16	82	102	TATA-box
			VmSWEE16	83	103	TATA-box
			VmSWEE16	84	104	AT~TATA-box
			VmSWEE16	84	104	TATA-box
			VmSWEE16	85	105	TATA-box
			VmSWEE16	86	106	AT~TATA-box
			VmSWEE16	86	106	TATA-box
			VmSWEE16	88	108	TATA-box
			VmSWEE16	97	117	TGA-element
			VmSWEE16	130	150	CAAT-box
			VmSWEE16	166	186	CAAT-box
			VmSWEE16	170	190	Myb
			VmSWEE16	212	232	ABRE
			VmSWEE16	214	234	ABRE
			VmSWEE16	214	234	ABRE3a
			VmSWEE16	214	234	ABRE4
			VmSWEE16	214	234	G-box
			VmSWEE16	234	254	CAAT-box
			VmSWEE16	236	256	CAAT-box
			VmSWEE16	262	282	CAAT-box
			VmSWEE16	276	296	CAAT-box
			VmSWEE16	286	306	CAAT-box
			VmSWEE16	343	363	MYC
			VmSWEE16	357	377	CAAT-box
			VmSWEE16	357	377	MYC
			VmSWEE16	365	385	GC-motif
			VmSWEE16	373	393	ARE
			VmSWEE16	399	419	Myb
			VmSWEE16	429	449	TATA
			VmSWEE16	430	450	TATA-box
			VmSWEE16	431	451	TATA-box
			VmSWEE16	432	452	TATA-box
			VmSWEE16	433	453	TATA-box
			VmSWEE16	461	481	CAAT-box
			VmSWEE16	484	504	F-box
			VmSWEE16	491	511	CAAT-box
			VmSWEE16	528	548	CAAT-box
			VmSWEE16	534	554	CAAT-box
			VmSWEE16	536	556	TATA-box
			VmSWEE16	537	557	TATA-box
			VmSWEE16	556	576	TATA-box
			VmSWEE16	557	577	TATA-box
			VmSWEE16	558	578	AT~TATA-box
			VmSWEE16	558	578	TATA-box
			VmSWEE16	559	579	TATA-box
			VmSWEE16	560	580	TATA-box
			VmSWEE16	585	605	MYB
			VmSWEE16	609	629	CAAT-box
			VmSWEE16	613	633	ARE
			VmSWEE16	626	646	TATA-box
			VmSWEE16	627	647	TATA-box
			VmSWEE16	628	648	TATA-box
			VmSWEE16	695	715	CAAT-box
			VmSWEE16	702	722	GT1-motif
			VmSWEE16	703	723	GT1-motif
			VmSWEE16	704	724	MYB
			VmSWEE16	704	724	MYB-like sequence
			VmSWEE16	739	759	CAAT-box
			VmSWEE16	757	777	G-box
			VmSWEE16	758	778	ABRE3a
			VmSWEE16	758	778	ABRE4
			VmSWEE16	758	778	G-box
			VmSWEE16	759	779	ABRE
			VmSWEE16	768	788	CAAT-box
			VmSWEE16	769	789	CAAT-box
			VmSWEE16	787	807	CAAT-box
			VmSWEE16	788	808	CAAT-box
			VmSWEE16	814	834	CAAT-box
			VmSWEE16	815	835	CAAT-box
			VmSWEE16	817	837	TATA-box
			VmSWEE16	818	838	TATA-box
			VmSWEE16	819	839	TATA-box
			VmSWEE16	836	856	ABRE
			VmSWEE16	836	856	G-box
			VmSWEE16	841	861	LTR
			VmSWEE16	894	914	CAAT-box
			VmSWEE16	895	915	ATCT-motif
			VmSWEE16	923	943	CAAT-box
			VmSWEE16	926	946	CAAT-box
			VmSWEE16	969	989	TATA-box
			VmSWEE16	981	1001	TATA-box
			VmSWEE16	1000	1020	CAAT-box
			VmSWEE16	1019	1039	CAAT-box
			VmSWEE16	1029	1049	G-Box
			VmSWEE16	1030	1050	ABRE
			VmSWEE16	1059	1079	MYC
			VmSWEE16	1065	1085	MBS
			VmSWEE16	1065	1085	Myb
			VmSWEE16	1079	1099	CAAT-box
			VmSWEE16	1080	1100	CAAT-box
			VmSWEE16	1170	1190	TCT-motif
			VmSWEE16	1235	1255	CAAT-box
			VmSWEE16	1264	1284	Box 4
			VmSWEE16	1269	1289	TATA-box
			VmSWEE16	1271	1291	TATA-box
			VmSWEE16	1284	1304	CAAT-box
			VmSWEE16	1305	1325	TATA-box
			VmSWEE16	1339	1359	STRE
			VmSWEE16	1359	1379	CAAT-box
			VmSWEE16	1365	1385	ARE
			VmSWEE16	1414	1434	STRE
			VmSWEE16	1592	1612	CAAT-box
			VmSWEE16	1594	1614	CAAT-box
			VmSWEE16	1619	1639	Box 4
			VmSWEE16	1623	1643	Box 4
			VmSWEE16	1656	1676	MYB
			VmSWEE16	1690	1710	TC-rich repeats
			VmSWEE16	1709	1729	CAAT-box
			VmSWEE16	1728	1748	CAAT-box
			VmSWEE16	1748	1768	CAAT-box
			VmSWEE16	1752	1772	CAAT-box
			VmSWEE16	1774	1794	TC-rich repeats
			VmSWEE16	1783	1803	CAAT-box
			VmSWEE16	1785	1805	TATA-box
			VmSWEE16	1786	1806	TATA-box
			VmSWEE16	1793	1813	TATA-box
			VmSWEE16	1795	1815	TATA-box
			VmSWEE16	1856	1876	CAAT-box
			VmSWEE16	1856	1876	MYC
			VmSWEE16	1858	1878	CAAT-box
			VmSWEE16	1872	1892	CAAT-box
			VmSWEE16	1882	1902	AT-rich element
			VmSWEE16	1899	1919	CAAT-box
			VmSWEE16	1899	1919	MYC
			VmSWEE16	1965	1985	CAAT-box
			VmSWEE16	1983	2003	CAAT-box
			VmSWEE16	1994	2014	CAAT-box
