# Supplementary material for: Genome-wide identification and expression analyses of SWEET gene family reveal potential roles in plant development, fruit ripening and abiotic stress responses in cranberry (Vaccinium macrocarpon Ait)
Source: PeerJ. 2024 Sep 19;12:e17974. doi: 10.7717/peerj.17974 (PMC11416763; doi:10.7717/peerj.17974)
Supplement: Supplemental Information 4 [file peerj-12-17974-s004.xlsx]

## Sheet: Table S4
Supplementary File 4 qRT-PCR primers of VmSWEET genes in cranberry
Gene name	Forward primer (5'->3')	Reverse primer (5'->3')
VmSAND	ATGTTGTCTTCTCTTCTCTCGTCC	AAAGAGGACACCAGAATCAGCTAC
VmSWEET1.1	TGCTCTCTGCTTGGTATGGC	GACCACAAACGTGACAAGCC
VmSWEET1.2	TTGCTGCCTCCATATTCTCCA	ATGGCATGTACTCCACGCTC
VmSWEET2.1	GATGTTTGGGTTGCTGCTGG	GTGTCGAACAGTGAAGTCGC
VmSWEET2.2	GCTGGAATTGCTGGGAACCT	GGCAACAGGTATAACGTCCG
VmSWEET3	GCAGTTGGAGTGATGGGGAA	ACAACAGGCAAGCCATACCA
VmSWEET4	TCCCCATTCCCAACGGTCTA	TGACGGTAATGTTGCCAGGG
VmSWEET5	TGCATACCACCAAGCGAAGA	ACAAGGCCGTTCAGGAAGTT
VmSWEET10.1	TCGCTGATGATTGTCGGCTT	AGAGGTGCTGCAAATACGCT
VmSWEET10.2	GTGTTTCTTTCTCCGCTGCC	GCACCATCGCACTGAACAAG
VmSWEET12	TCAATGCTGTTGCGTGGTTC	CGTTTCGCCACCGTTGATTT
VmSWEET13	GTCTACCTTGCTCCAGTGCC	GGGTCACGGTCAACATCCTC
VmSWEET14	TGCTTCAGGTTGTCCGTACC	AAACCCACTACGTTCGGGAC
VmSWEET16	GTGGTGACGACGAAGAGTGT	CCGCAAGGATAACATCGTGC
