# Supplementary material for: Genome-wide identification and expression analyses of SWEET gene family reveal potential roles in plant development, fruit ripening and abiotic stress responses in cranberry (Vaccinium macrocarpon Ait)
Source: PeerJ. 2024 Sep 19;12:e17974. doi: 10.7717/peerj.17974 (PMC11416763; doi:10.7717/peerj.17974)
Supplement: Supplemental Information 5 [file peerj-12-17974-s005.xlsx]

## Sheet: Sheet1
Supplementary File 5 The raw data of Ct value used for qRT-PCR in Fig. 9-11
Different tissues	Biological replicate	Ct value				fruit development period	Biological replicate	Ct value				Salinity stress	Biological replicate	Ct value				Salt-alkali stress	Biological replicate	Ct value				Aluminum stress	Biological replicate	Ct value				Drought stress	Biological replicate	Ct value
		SAND	VmSWEET1.1					SAND	VmSWEET1.1					SAND	VmSWEET1					SAND	VmSWEET1					SAND	VmSWEET1					SAND	VmSWEET1
Rt	Rep-1	25.5358	31.2157			S1	Rep-1	26.9374	26.6206			CK	Rep-1	22.9401	30.9642			CK	Rep-1	22.9401	31.7523			CK	Rep-1	22.9401	32.7564			CK	Rep-1	22.9401	32.0154
Rt	Rep-2	25.5846	31.1208			S1	Rep-2	26.9351	26.8801			CK	Rep-2	22.5822	30.8893			CK	Rep-2	22.8822	31.8894			CK	Rep-2	22.7822	32.9879			CK	Rep-2	22.9822	31.8875
Rt	Rep-3	25.8985	31.1955			S1	Rep-3	26.8384	26.8478			CK	Rep-3	23.0746	30.9126			CK	Rep-3	23.0746	31.9126			CK	Rep-3	23.0746	32.9126			CK	Rep-3	23.0746	31.9126
U	Rep-1	24.3598	30.9142			S2	Rep-1	27.8782	26.7655			3h	Rep-1	20.066	31.2838			3h	Rep-1	22.7816	31.7745			3h	Rep-1	22.2189	32.9151			3h	Rep-1	23.1856	33.7924
U	Rep-2	24.3502	30.7929			S2	Rep-2	27.6629	26.6697			3h	Rep-2	23.5187	31.5468			3h	Rep-2	22.5952	31.706			3h	Rep-2	22.5798	32.8964			3h	Rep-2	23.4265	33.8874
U	Rep-3	24.3734	30.5384			S2	Rep-3	27.6907	26.7488			3h	Rep-3	23.2771	31.5511			3h	Rep-3	22.8118	31.7032			3h	Rep-3	22.5223	32.9973			3h	Rep-3	23.5068	33.8275
Rn	Rep-1	27.6283	31.7766			S3	Rep-1	27.3473	26.6792			6h	Rep-1	22.8547	32.0838			6h	Rep-1	21.9286	31.1441			6h	Rep-1	22.5581	32.8037			6h	Rep-1	22.3301	33.5826
Rn	Rep-2	27.3564	31.4706			S3	Rep-2	27.5727	26.9385			6h	Rep-2	23.3096	31.9047			6h	Rep-2	21.905	30.9852			6h	Rep-2	22.4992	32.9385			6h	Rep-2	22.587	33.7932
Rn	Rep-3	27.8469	31.2738			S3	Rep-3	27.718	26.7416			6h	Rep-3	22.9501	31.7511			6h	Rep-3	21.6107	31.0755			6h	Rep-3	22.5739	32.9275			6h	Rep-3	22.5844	33.6096
UrL	Rep-1	27.7755	32.4501			S4	Rep-1	23.3305	23.2518			9h	Rep-1	22.694	31.8537			9h	Rep-1	23.6089	32.5793			9h	Rep-1	23.177	33.1971			9h	Rep-1	22.97	35.1313
UrL	Rep-2	27.323	32.1621			S4	Rep-2	23.2379	23.2927			9h	Rep-2	22.867	31.6883			9h	Rep-2	23.5484	32.2721			9h	Rep-2	22.9689	33.0963			9h	Rep-2	23.0211	34.9824
UrL	Rep-3	27.694	32.4602			S4	Rep-3	23.2291	23.3384			9h	Rep-3	22.8336	31.9579			9h	Rep-3	23.2207	32.4726			9h	Rep-3	23.1753	33.0186			9h	Rep-3	22.9481	35.0334
RnL	Rep-1	28.7088	32.7733									12h	Rep-1	22.9706	31.5075			12h	Rep-1	22.0685	32.8386			12h	Rep-1	23.7669	33.8499			12h	Rep-1	23.1905	35.3615
RnL	Rep-2	28.7291	32.9752					SAND	VmSWEET1.2			12h	Rep-2	22.6807	31.8635			12h	Rep-2	22.0109	32.924			12h	Rep-2	23.6927	33.7791			12h	Rep-2	22.9985	36.1982
RnL	Rep-3	28.9942	33.1862			S1	Rep-1	28.9411	28.69			12h	Rep-3	21.5322	31.7237			12h	Rep-3	21.9848	32.8237			12h	Rep-3	23.8659	33.7909			12h	Rep-3	23.0862	36.4487
F	Rep-1	29.2157	33.7933			S1	Rep-2	28.8466	28.6116			24h	Rep-1	23.0465	32.0785			24h	Rep-1	22.6796	32.9675			24h	Rep-1	23.9166	33.9925			24h	Rep-1	23.751	35.1402
F	Rep-2	28.8875	33.6699			S1	Rep-3	28.9198	28.759			24h	Rep-2	23.1275	32.4689			24h	Rep-2	22.8695	32.8667			24h	Rep-2	23.5472	33.949			24h	Rep-2	23.6323	35.3904
F	Rep-3	29.11	33.7282			S2	Rep-1	29.2674	29.0032			24h	Rep-3	23.132	32.3379			24h	Rep-3	22.6652	32.7726			24h	Rep-3	23.7009	34.0175			24h	Rep-3	23.9509	35.0851
						S2	Rep-2	29.2843	28.917
		SAND	VmSWEET1.2			S2	Rep-3	29.4576	28.9529					SAND	VmSWEET2					SAND	VmSWEET2					SAND	VmSWEET2					SAND	VmSWEET2
Rt	Rep-1	25.5358	28.8872			S3	Rep-1	27.3473	26.9376			CK	Rep-1	22.9401	24.7933			CK	Rep-1	22.9401	24.7933			CK	Rep-1	22.9401	24.8933			CK	Rep-1	22.9401	24.7933
Rt	Rep-2	25.5846	28.6822			S3	Rep-2	27.5727	26.8498			CK	Rep-2	22.5822	24.913			CK	Rep-2	22.5822	24.913			CK	Rep-2	22.5822	24.913			CK	Rep-2	22.5822	24.913
Rt	Rep-3	25.8985	28.8923			S3	Rep-3	27.718	26.915			CK	Rep-3	23.0746	25.2			CK	Rep-3	23.0746	25.2			CK	Rep-3	23.0746	25.2			CK	Rep-3	23.0746	25.2
U	Rep-1	24.3598	23.7039			S4	Rep-1	23.3305	22.4399			3h	Rep-1	22.5869	22.5775			3h	Rep-1	25.248	24.8273			3h	Rep-1	24.9188	27.4411			3h	Rep-1	23.5277	23.723
U	Rep-2	24.3502	23.6964			S4	Rep-2	23.2379	22.3263			3h	Rep-2	25.9358	22.8307			3h	Rep-2	25.4378	24.9204			3h	Rep-2	24.9411	27.4905			3h	Rep-2	23.4447	23.857
U	Rep-3	24.3734	23.6904			S4	Rep-3	23.2291	22.3825			3h	Rep-3	26.4189	22.7682			3h	Rep-3	25.4036	24.919			3h	Rep-3	25.0707	27.3741			3h	Rep-3	23.6836	24.0226
Rn	Rep-1	27.6283	29.3302									6h	Rep-1	26.2465	23.9573			6h	Rep-1	25.4956	24.8626			6h	Rep-1	24.6683	25.5472			6h	Rep-1	23.9076	23.8554
Rn	Rep-2	27.3564	29.2353					SAND	VmSWEET2.1			6h	Rep-2	26.1872	24.0392			6h	Rep-2	25.7405	25.1074			6h	Rep-2	24.7582	25.7213			6h	Rep-2	24.0609	23.6404
Rn	Rep-3	27.8469	29.4187			S1	Rep-1	26.9374	26.8853			6h	Rep-3	26.3084	24.1445			6h	Rep-3	25.5859	24.9868			6h	Rep-3	24.7994	25.7199			6h	Rep-3	23.9106	23.5652
UrL	Rep-1	27.7755	27.9146			S1	Rep-2	26.9351	26.9116			9h	Rep-1	26.3818	23.9396			9h	Rep-1	25.9432	24.9509			9h	Rep-1	24.714	24.7254			9h	Rep-1	23.815	23.0661
UrL	Rep-2	27.323	27.8664			S1	Rep-3	26.8384	27.051			9h	Rep-2	26.2603	23.9081			9h	Rep-2	25.7245	24.9225			9h	Rep-2	24.8697	24.97			9h	Rep-2	24.0644	23.2154
UrL	Rep-3	27.694	27.6999			S2	Rep-1	27.8782	28.6857			9h	Rep-3	25.6769	23.8638			9h	Rep-3	25.998	24.9908			9h	Rep-3	24.6602	24.8821			9h	Rep-3	23.9062	23.0273
RnL	Rep-1	28.7088	28.7559			S2	Rep-2	27.6629	28.6058			12h	Rep-1	26.1726	23.6889			12h	Rep-1	24.944	23.7779			12h	Rep-1	24.8807	22.6662			12h	Rep-1	23.6428	23.3438
RnL	Rep-2	28.7291	28.462			S2	Rep-3	27.6907	28.5058			12h	Rep-2	25.8372	23.7277			12h	Rep-2	24.9485	23.689			12h	Rep-2	24.8092	22.9629			12h	Rep-2	23.676	23.2417
RnL	Rep-3	28.9942	28.7474			S3	Rep-1	27.3473	28.4237			12h	Rep-3	26.2221	23.6511			12h	Rep-3	24.9369	23.6453			12h	Rep-3	24.9723	22.7978			12h	Rep-3	23.5544	23.3746
F	Rep-1	29.2157	28.4501			S3	Rep-2	27.5727	28.7119			24h	Rep-1	26.3771	23.6825			24h	Rep-1	25.1533	23.8154			24h	Rep-1	25.1753	23.9348			24h	Rep-1	23.8843	23.2741
F	Rep-2	28.8875	28.1439			S3	Rep-3	27.718	28.6935			24h	Rep-2	25.9722	23.4524			24h	Rep-2	24.9954	23.8213			24h	Rep-2	25.0864	23.4335			24h	Rep-2	23.6579	23.3977
F	Rep-3	29.11	28.4565			S4	Rep-1	23.3305	25.314			24h	Rep-3	26.4532	23.4066			24h	Rep-3	25.3116	23.7301			24h	Rep-3	25.3283	23.7865			24h	Rep-3	23.436	23.4973
						S4	Rep-2	23.2379	25.3249
		SAND	VmSWEET2.1			S4	Rep-3	23.2291	25.4986					SAND	VmSWEET3					SAND	VmSWEET3					SAND	VmSWEET3					SAND	VmSWEET3
Rt	Rep-1	25.5358	25.707									CK	Rep-1	22.8914	31.4808			CK	Rep-1	22.8914	32.4536			CK	Rep-1	22.8914	31.4388			CK	Rep-1	22.8914	31.2455
Rt	Rep-2	25.5846	25.6905					SAND	VmSWEET2.2			CK	Rep-2	22.5328	31.7119			CK	Rep-2	22.4328	32.4946			CK	Rep-2	22.4328	31.7019			CK	Rep-2	22.4328	31.0171
Rt	Rep-3	25.8985	25.7243			S1	Rep-1	26.9129	28.8949			CK	Rep-3	22.7618	31.5893			CK	Rep-3	22.7618	32.4443			CK	Rep-3	22.7618	31.6317			CK	Rep-3	22.7618	30.9379
U	Rep-1	24.3598	26.911			S1	Rep-2	26.9076	28.6996			3h	Rep-1	23.5368	34.8547			3h	Rep-1	23.5127	34.7664			3h	Rep-1	22.9651	33.792			3h	Rep-1	23.5114	32.6042
U	Rep-2	24.3502	26.6777			S1	Rep-3	26.9309	28.6598			3h	Rep-2	23.2647	34.7096			3h	Rep-2	23.2805	34.8291			3h	Rep-2	23.1181	33.4879			3h	Rep-2	23.1143	32.6203
U	Rep-3	24.3734	26.5757			S2	Rep-1	27.1927	27.6998			3h	Rep-3	23.2378	34.9501			3h	Rep-3	23.7506	34.7018			3h	Rep-3	22.9497	33.775			3h	Rep-3	23.6431	32.7237
Rn	Rep-1	27.6878	27.4344			S2	Rep-2	27.2396	27.7231			6h	Rep-1	21.7149	34.0745			6h	Rep-1	22.1905	33.4621			6h	Rep-1	22.4556	33.7005			6h	Rep-1	23.3117	33.6171
Rn	Rep-2	27.7228	27.4179			S2	Rep-3	27.2408	27.9141			6h	Rep-2	21.8828	34.187			6h	Rep-2	22.5742	33.5316			6h	Rep-2	22.9112	33.5662			6h	Rep-2	23.7917	33.578
Rn	Rep-3	27.9961	27.4909			S3	Rep-1	27.3473	28.5808			6h	Rep-3	21.9219	34.2662			6h	Rep-3	22.6458	33.5389			6h	Rep-3	22.8045	33.5254			6h	Rep-3	23.7554	33.7554
UrL	Rep-1	27.9486	26.9267			S3	Rep-2	27.5727	28.3041			9h	Rep-1	23.349	35.6168			9h	Rep-1	22.7605	32.89			9h	Rep-1	23.03	33.97			9h	Rep-1	24.0398	34.8781
UrL	Rep-2	27.924	26.9114			S3	Rep-3	27.718	28.856			9h	Rep-2	23.1833	35.7411			9h	Rep-2	22.9096	32.7489			9h	Rep-2	23.1995	33.8821			9h	Rep-2	23.9682	34.9295
UrL	Rep-3	27.925	26.9546			S4	Rep-1	23.3305	25.429			9h	Rep-3	22.9011	35.6019			9h	Rep-3	22.579	32.7969			9h	Rep-3	23.4662	33.8062			9h	Rep-3	24.2007	34.7472
RnL	Rep-1	28.3744	28.7052			S4	Rep-2	23.2379	25.2518			12h	Rep-1	22.5979	34.7682			12h	Rep-1	23.6816	33.4657			12h	Rep-1	22.0469	33.7797			12h	Rep-1	22.0917	33.8634
RnL	Rep-2	28.127	28.8752			S4	Rep-3	23.2291	25.479			12h	Rep-2	22.5219	34.8781			12h	Rep-2	23.1822	33.2636			12h	Rep-2	22.3347	33.4289			12h	Rep-2	22.3904	33.7625
RnL	Rep-3	28.059	28.8617									12h	Rep-3	22.4698	34.0591			12h	Rep-3	23.416	33.4525			12h	Rep-3	22.3733	33.666			12h	Rep-3	21.9105	33.7323
F	Rep-1	28.1825	28.3665					SAND	VmSWEET3			24h	Rep-1	23.7628	33.4706			24h	Rep-1	23.5203	34.2597			24h	Rep-1	23.9446	34.6014			24h	Rep-1	24.8392	34.3561
F	Rep-2	28.0359	28.2867			S1	Rep-1	26.9374	26.9766			24h	Rep-2	23.9599	33.7766			24h	Rep-2	23.6366	34.3108			24h	Rep-2	24.2788	34.7714			24h	Rep-2	24.9161	34.291
F	Rep-3	28.0929	28.3447			S1	Rep-2	26.9351	26.9213			24h	Rep-3	23.5856	33.4706			24h	Rep-3	23.8533	34.3501			24h	Rep-3	24.3886	34.714			24h	Rep-3	24.6248	34.409
						S1	Rep-3	26.8384	26.7873
		SAND	VmSWEET2.2			S2	Rep-1	27.8782	27.9691					SAND	VmSWEET4					SAND	VmSWEET4					SAND	VmSWEET4					SAND	VmSWEET4
Rt	Rep-1	25.5358	28.624			S2	Rep-2	27.6629	27.9054			CK	Rep-1	22.9401	23.9324			CK	Rep-1	22.9401	22.9324			CK	Rep-1	22.9401	22.9324			CK	Rep-1	22.9401	23.9324
Rt	Rep-2	25.5846	28.7913			S2	Rep-3	27.6907	27.9856			CK	Rep-2	22.5822	22.8026			CK	Rep-2	22.5822	22.9026			CK	Rep-2	22.5822	22.9026			CK	Rep-2	22.5822	22.8026
Rt	Rep-3	25.8985	28.9087			S3	Rep-1	27.3473	27.9224			CK	Rep-3	23.0746	22.9045			CK	Rep-3	23.0746	22.9045			CK	Rep-3	23.0746	22.9045			CK	Rep-3	23.0746	22.9045
U	Rep-1	24.3598	27.2038			S3	Rep-2	27.5727	27.9638			3h	Rep-1	22.5869	24.891			3h	Rep-1	25.248	27.2372			3h	Rep-1	24.9188	26.538			3h	Rep-1	23.5277	23.8779
U	Rep-2	24.3502	27.1802			S3	Rep-3	27.718	27.915			3h	Rep-2	25.9358	24.6698			3h	Rep-2	25.4378	27.1833			3h	Rep-2	24.9411	26.8427			3h	Rep-2	23.4447	23.7986
U	Rep-3	24.3734	27.2733			S4	Rep-1	23.3305	24.4494			3h	Rep-3	26.4189	24.6997			3h	Rep-3	25.4036	27.3581			3h	Rep-3	25.0707	26.6272			3h	Rep-3	23.6836	23.7401
Rn	Rep-1	28.3369	28.2018			S4	Rep-2	23.2379	24.3109			6h	Rep-1	26.2465	24.6331			6h	Rep-1	25.4956	25.1767			6h	Rep-1	24.6683	26.7821			6h	Rep-1	23.9076	23.7591
Rn	Rep-2	28.6303	28.5755			S4	Rep-3	23.2291	24.472			6h	Rep-2	26.1872	24.7855			6h	Rep-2	25.7405	25.3223			6h	Rep-2	24.7582	26.7094			6h	Rep-2	24.0609	23.9476
Rn	Rep-3	28.6771	28.5323									6h	Rep-3	26.3084	24.5818			6h	Rep-3	25.5859	25.3712			6h	Rep-3	24.7994	26.5872			6h	Rep-3	23.9106	23.994
UrL	Rep-1	28.1167	27.622					SAND	VmSWEET4			9h	Rep-1	26.3818	26.5436			9h	Rep-1	25.9432	25.4884			9h	Rep-1	24.714	25.4493			9h	Rep-1	23.815	23.9295
UrL	Rep-2	27.9781	27.2845			S1	Rep-1	26.9374	22.3493			9h	Rep-2	26.2603	26.5017			9h	Rep-2	25.7245	25.5715			9h	Rep-2	24.8697	25.7606			9h	Rep-2	24.0644	23.7597
UrL	Rep-3	28.1064	27.787			S1	Rep-2	26.9351	22.4826			9h	Rep-3	25.6769	26.6742			9h	Rep-3	25.998	25.4313			9h	Rep-3	24.6602	25.6484			9h	Rep-3	23.9062	23.841
RnL	Rep-1	29.9269	30.7474			S1	Rep-3	26.8384	22.3746			12h	Rep-1	26.1726	26.5769			12h	Rep-1	24.944	24.6391			12h	Rep-1	24.8807	25.9167			12h	Rep-1	23.6428	22.109
RnL	Rep-2	29.6753	30.3652			S2	Rep-1	27.8782	27.9398			12h	Rep-2	25.8372	26.6286			12h	Rep-2	24.9485	24.5022			12h	Rep-2	24.8092	25.6621			12h	Rep-2	23.676	22.0761
RnL	Rep-3	29.9	30.4741			S2	Rep-2	27.6629	27.9414			12h	Rep-3	26.2221	26.486			12h	Rep-3	24.9369	24.6329			12h	Rep-3	24.9723	25.5352			12h	Rep-3	23.5544	22.0028
F	Rep-1	28.6907	29.566			S2	Rep-3	27.6907	28.0556			24h	Rep-1	26.3771	26.7375			24h	Rep-1	25.1533	24.7518			24h	Rep-1	25.1753	24.5671			24h	Rep-1	23.8843	23.534
F	Rep-2	28.5666	29.4786			S3	Rep-1	27.4859	28.3299			24h	Rep-2	25.9722	26.9712			24h	Rep-2	24.9954	24.8838			24h	Rep-2	25.0864	24.629			24h	Rep-2	23.6579	23.4847
F	Rep-3	28.735	29.9144			S3	Rep-2	27.5175	28.2958			24h	Rep-3	26.4532	26.9436			24h	Rep-3	25.3116	24.7911			24h	Rep-3	25.3283	24.7665			24h	Rep-3	23.436	23.3939
						S3	Rep-3	27.4862	28.7084
		SAND	VmSWEET3			S4	Rep-1	23.3305	19.0505					SAND	VmSWEET5					SAND	VmSWEET5					SAND	VmSWEET5					SAND	VmSWEET5
Rt	Rep-1	25.5358	28.6544			S4	Rep-2	23.2379	19.0375			CK	Rep-1	22.9401	23.9295			CK	Rep-1	22.9401	23.9295			CK	Rep-1	22.9401	23.9295			CK	Rep-1	22.9401	23.9295
Rt	Rep-2	25.5846	28.8925			S4	Rep-3	23.2291	19.1649			CK	Rep-2	22.5822	23.7967			CK	Rep-2	22.5822	23.7967			CK	Rep-2	22.5822	23.7967			CK	Rep-2	22.5822	23.7967
Rt	Rep-3	25.8985	28.7874									CK	Rep-3	23.0746	23.5927			CK	Rep-3	23.0746	23.5927			CK	Rep-3	23.0746	23.5927			CK	Rep-3	23.0746	23.5927
U	Rep-1	24.3598	25.9326					SAND	VmSWEET5			3h	Rep-1	24.6374	25.7499			3h	Rep-1	24.9562	25.8607			3h	Rep-1	25.1978	26.1021			3h	Rep-1	25.9643	26.5181
U	Rep-2	24.3502	25.9252			S1	Rep-1	26.9129	28.8949			3h	Rep-2	24.731	25.8671			3h	Rep-2	25.068	25.9961			3h	Rep-2	25.6681	26.2989			3h	Rep-2	25.9168	26.4073
U	Rep-3	24.3734	25.7888			S1	Rep-2	26.9076	28.6996			3h	Rep-3	24.9219	25.7414			3h	Rep-3	25.1703	26.0737			3h	Rep-3	25.377	26.1564			3h	Rep-3	25.8519	26.4777
Rn	Rep-1	27.6878	28.6412			S1	Rep-3	26.9309	28.6598			6h	Rep-1	24.9095	26.0283			6h	Rep-1	25.7409	26.7457			6h	Rep-1	25.3098	26.4102			6h	Rep-1	25.9047	26.9261
Rn	Rep-2	27.7228	28.3095			S2	Rep-1	27.1927	27.6998			6h	Rep-2	24.965	26.1024			6h	Rep-2	25.8147	26.8936			6h	Rep-2	25.2215	26.4015			6h	Rep-2	26.1435	26.9098
Rn	Rep-3	27.9961	28.2072			S2	Rep-2	27.2396	27.7231			6h	Rep-3	24.9659	26.0512			6h	Rep-3	25.7924	26.6347			6h	Rep-3	25.1527	26.5205			6h	Rep-3	25.8773	26.8359
UrL	Rep-1	27.9486	30.8213			S2	Rep-3	27.2408	27.9141			9h	Rep-1	24.7575	26.4854			9h	Rep-1	25.7034	26.929			9h	Rep-1	24.6977	25.9822			9h	Rep-1	25.9429	27.0969
UrL	Rep-2	27.924	30.6394			S3	Rep-1	27.3473	28.5808			9h	Rep-2	24.9829	26.7347			9h	Rep-2	25.7408	26.7538			9h	Rep-2	24.9057	25.976			9h	Rep-2	25.9281	27.2722
UrL	Rep-3	27.925	30.467			S3	Rep-2	27.5727	28.3041			9h	Rep-3	25.034	26.5719			9h	Rep-3	25.9323	26.9789			9h	Rep-3	24.6512	25.857			9h	Rep-3	26.0628	27.1935
RnL	Rep-1	28.3744	25.7378			S3	Rep-3	27.718	28.856			12h	Rep-1	24.97	27.2049			12h	Rep-1	25.779	26.9329			12h	Rep-1	25.4347	26.9704			12h	Rep-1	24.5761	26.4237
RnL	Rep-2	28.127	25.781			S4	Rep-1	23.3305	25.429			12h	Rep-2	25.0438	26.9114			12h	Rep-2	25.6598	26.8526			12h	Rep-2	25.4591	26.9811			12h	Rep-2	24.7594	26.6171
RnL	Rep-3	28.059	25.8582			S4	Rep-2	23.2379	25.2518			12h	Rep-3	25.1076	26.936			12h	Rep-3	25.7243	26.9857			12h	Rep-3	25.4607	26.8715			12h	Rep-3	24.8054	26.578
F	Rep-1	28.1825	25.8569			S4	Rep-3	23.2291	25.479			24h	Rep-1	25.2969	28.5129			24h	Rep-1	24.8729	27.5691			24h	Rep-1	25.4849	27.117			24h	Rep-1	23.4089	25.9206
F	Rep-2	28.0359	25.7819									24h	Rep-2	25.176	28.6406			24h	Rep-2	24.8643	27.4685			24h	Rep-2	25.397	27.0257			24h	Rep-2	23.9985	25.9377
F	Rep-3	28.0929	25.8397					SAND	VmSWEET10.1			24h	Rep-3	25.1697	28.619			24h	Rep-3	24.7893	27.3926			24h	Rep-3	25.4174	27.1902			24h	Rep-3	23.9936	25.846
						S1	Rep-1	26.9374	26.8159
		SAND	VmSWEET4			S1	Rep-2	26.9351	26.9094					SAND	VmSWEET6					SAND	VmSWEET6					SAND	VmSWEET6					SAND	VmSWEET6
Rt	Rep-1	26.373	29.7816			S1	Rep-3	26.8384	26.9282			CK	Rep-1	22.9401	23.0518			CK	Rep-1	22.9401	23.0518			CK	Rep-1	22.9401	23.0518			CK	Rep-1	22.9401	23.0518
Rt	Rep-2	26.1049	29.95			S2	Rep-1	27.8782	30.4879			CK	Rep-2	22.5822	22.9667			CK	Rep-2	22.5822	22.9667			CK	Rep-2	22.5822	22.9667			CK	Rep-2	22.5822	22.9667
Rt	Rep-3	26.1887	29.9086			S2	Rep-2	27.6629	30.775			CK	Rep-3	23.0746	22.9203			CK	Rep-3	23.0746	22.9203			CK	Rep-3	23.0746	22.9203			CK	Rep-3	23.0746	22.9203
U	Rep-1	25.027	25.6559			S2	Rep-3	27.6907	30.7005			3h	Rep-1	24.6374	24.9402			3h	Rep-1	24.9562	25.2216			3h	Rep-1	25.1978	25.5202			3h	Rep-1	23.9412	24.6244
U	Rep-2	25.1002	25.9249			S3	Rep-1	27.3473	28.121			3h	Rep-2	24.731	24.9401			3h	Rep-2	25.068	25.2136			3h	Rep-2	25.6681	25.6213			3h	Rep-2	24.8447	24.5421
U	Rep-3	24.9967	25.5069			S3	Rep-2	27.5727	28.5829			3h	Rep-3	24.9219	24.9559			3h	Rep-3	25.1703	25.1374			3h	Rep-3	25.377	25.6436			3h	Rep-3	24.0299	24.655
Rn	Rep-1	27.6283	30.9365			S3	Rep-3	27.718	28.5638			6h	Rep-1	24.9095	25.3396			6h	Rep-1	25.7409	26.1777			6h	Rep-1	25.3098	25.6121			6h	Rep-1	22.9531	23.4774
Rn	Rep-2	27.3564	30.7204			S4	Rep-1	23.3305	23.3305			6h	Rep-2	24.965	25.2067			6h	Rep-2	25.8147	26.0086			6h	Rep-2	25.2215	25.693			6h	Rep-2	22.7062	23.5529
Rn	Rep-3	27.8469	30.7363			S4	Rep-2	23.2379	23.2379			6h	Rep-3	24.9659	25.2917			6h	Rep-3	25.7924	26.1527			6h	Rep-3	25.1527	25.5762			6h	Rep-3	23.0066	23.4594
UrL	Rep-1	27.7755	30.5993			S4	Rep-3	23.2291	23.2291			9h	Rep-1	24.7575	25.5187			9h	Rep-1	25.7034	26.3205			9h	Rep-1	24.6977	25.3931			9h	Rep-1	23.5797	24.2365
UrL	Rep-2	27.323	30.427									9h	Rep-2	24.9829	25.4943			9h	Rep-2	25.7408	26.3297			9h	Rep-2	24.9057	25.4654			9h	Rep-2	23.8488	24.2902
UrL	Rep-3	27.694	30.3427					SAND	VmSWEET10.2			9h	Rep-3	25.034	25.4052			9h	Rep-3	25.9323	26.3486			9h	Rep-3	24.6512	25.3662			9h	Rep-3	23.4406	24.3601
RnL	Rep-1	28.7088	32.0713			S1	Rep-1	28.9411	29.2674			12h	Rep-1	24.97	25.7779			12h	Rep-1	25.779	26.625			12h	Rep-1	25.4347	26.4748			12h	Rep-1	23.9228	24.7287
RnL	Rep-2	28.7291	31.8426			S1	Rep-2	28.8466	29.2843			12h	Rep-2	25.0438	25.5728			12h	Rep-2	25.6598	26.7739			12h	Rep-2	25.4591	26.3745			12h	Rep-2	23.9889	24.8086
RnL	Rep-3	28.9942	31.9128			S1	Rep-3	28.9198	29.4576			12h	Rep-3	25.1076	25.6736			12h	Rep-3	25.7243	26.6375			12h	Rep-3	25.4607	26.187			12h	Rep-3	24.1068	24.7634
F	Rep-1	29.2157	32.922			S2	Rep-1	27.3473	23.3305			24h	Rep-1	25.2969	26.6952			24h	Rep-1	24.8729	26.356			24h	Rep-1	25.4849	26.8173			24h	Rep-1	25.2032	25.9996
F	Rep-2	28.8875	32.8973			S2	Rep-2	27.5727	23.2379			24h	Rep-2	25.176	26.6407			24h	Rep-2	24.8643	26.4787			24h	Rep-2	25.397	26.8765			24h	Rep-2	24.8711	25.9046
F	Rep-3	29.11	32.6899			S2	Rep-3	27.718	23.2291			24h	Rep-3	25.1697	26.7524			24h	Rep-3	24.7893	26.3382			24h	Rep-3	25.4174	26.78			24h	Rep-3	25.1448	25.8345
						S3	Rep-1	27.8336	28.5126
		SAND	VmSWEET5			S3	Rep-2	27.7146	28.6162					SAND	VmSWEET7					SAND	VmSWEET7					SAND	VmSWEET7					SAND	VmSWEET7
Rt	Rep-1	25.5358	30.979			S3	Rep-3	27.8926	28.6364			CK	Rep-1	22.9401	28.9423			CK	Rep-1	22.9401	28.9423			CK	Rep-1	22.9401	28.9423			CK	Rep-1	22.9401	28.9423
Rt	Rep-2	25.5846	30.8416			S4	Rep-1	25.6716	21.2683			CK	Rep-2	22.5822	28.9407			CK	Rep-2	22.5822	28.9407			CK	Rep-2	22.5822	28.9407			CK	Rep-2	22.5822	28.9407
Rt	Rep-3	25.8985	30.8686			S4	Rep-2	25.8239	21.2518			CK	Rep-3	23.0746	29.1094			CK	Rep-3	23.0746	29.1094			CK	Rep-3	23.0746	29.1094			CK	Rep-3	23.0746	29.1094
U	Rep-1	24.3598	26.8439			S4	Rep-3	25.6682	21.292			3h	Rep-1	24.6374	28.2587			3h	Rep-1	24.9562	31.3531			3h	Rep-1	25.1978	29.9045			3h	Rep-1	25.9643	31.0108
U	Rep-2	24.3502	26.633									3h	Rep-2	24.731	28.5849			3h	Rep-2	25.068	31.4907			3h	Rep-2	25.6681	29.7612			3h	Rep-2	25.9168	31.0084
U	Rep-3	24.3734	26.4976					SAND	VmSWEET12			3h	Rep-3	24.9219	28.659			3h	Rep-3	25.1703	31.5648			3h	Rep-3	25.377	29.8486			3h	Rep-3	25.8519	31.2309
Rn	Rep-1	28.3369	31.9629			S1	Rep-1	26.9374	29.4323			6h	Rep-1	24.9095	28.2193			6h	Rep-1	25.7409	31.2627			6h	Rep-1	25.3098	28.9289			6h	Rep-1	25.9047	32.4344
Rn	Rep-2	28.6303	31.9389			S1	Rep-2	26.9351	29.2279			6h	Rep-2	24.965	28.3523			6h	Rep-2	25.8147	31.1851			6h	Rep-2	25.2215	28.7799			6h	Rep-2	26.1435	32.5561
Rn	Rep-3	28.6771	31.9936			S1	Rep-3	26.8384	29.3438			6h	Rep-3	24.9659	28.1599			6h	Rep-3	25.7924	31.2216			6h	Rep-3	25.1527	28.7925			6h	Rep-3	25.8773	32.4123
UrL	Rep-1	28.1167	32.3698			S2	Rep-1	27.8782	30.8363			9h	Rep-1	24.7575	28.8784			9h	Rep-1	25.7034	31.2423			9h	Rep-1	24.6977	28.5835			9h	Rep-1	25.9429	31.484
UrL	Rep-2	27.9781	32.4976			S2	Rep-2	27.6629	30.7374			9h	Rep-2	24.9829	28.8414			9h	Rep-2	25.7408	31.2919			9h	Rep-2	24.9057	28.5822			9h	Rep-2	25.9281	31.4344
UrL	Rep-3	28.1064	32.0869			S2	Rep-3	27.6907	30.5826			9h	Rep-3	25.034	28.8894			9h	Rep-3	25.9323	31.2219			9h	Rep-3	24.6512	28.6874			9h	Rep-3	26.0628	31.5657
RnL	Rep-1	29.9269	33.1257			S3	Rep-1	26.9988	33.829			12h	Rep-1	24.97	29.3523			12h	Rep-1	25.779	31.1925			12h	Rep-1	25.4347	29.7753			12h	Rep-1	24.5761	30.6664
RnL	Rep-2	29.6753	33.2313			S3	Rep-2	27.1876	33.7239			12h	Rep-2	25.0438	29.386			12h	Rep-2	25.6598	31.0776			12h	Rep-2	25.4591	29.7843			12h	Rep-2	24.7594	30.6455
RnL	Rep-3	29.9	33.1792			S3	Rep-3	27.2597	33.8384			12h	Rep-3	25.1076	28.9336			12h	Rep-3	25.7243	31.0786			12h	Rep-3	25.4607	29.9203			12h	Rep-3	24.8054	30.7171
F	Rep-1	28.6907	32.2954			S4	Rep-1	23.3305	24.1788			24h	Rep-1	25.2969	29.0358			24h	Rep-1	24.8729	32.2392			24h	Rep-1	25.4849	31.6087			24h	Rep-1	23.4089	28.5537
F	Rep-2	28.5666	32.2836			S4	Rep-2	23.2379	24.0621			24h	Rep-2	25.176	29.3025			24h	Rep-2	24.8643	31.4954			24h	Rep-2	25.397	31.6181			24h	Rep-2	23.9985	28.3189
F	Rep-3	28.735	32.664			S4	Rep-3	23.2291	24.0085			24h	Rep-3	25.1697	29.1136			24h	Rep-3	24.7893	31.4228			24h	Rep-3	25.4174	31.5705			24h	Rep-3	23.9936	28.2983
		SAND	VmSWEET10.1					SAND	VmSWEET13					SAND	VmSWEET8					SAND	VmSWEET8					SAND	VmSWEET8					SAND	VmSWEET8
Rt	Rep-1	26.373	25.8972			S1	Rep-1	26.9374	27.0527			CK	Rep-1	22.9401	24.047			CK	Rep-1	22.9401	24.047			CK	Rep-1	22.9401	24.047			CK	Rep-1	22.9401	24.047
Rt	Rep-2	26.1049	25.7866			S1	Rep-2	26.9351	27.2364			CK	Rep-2	22.5822	23.975			CK	Rep-2	22.5822	23.975			CK	Rep-2	22.5822	23.975			CK	Rep-2	22.5822	23.975
Rt	Rep-3	26.1887	25.7741			S1	Rep-3	26.8384	27.0942			CK	Rep-3	23.0746	23.9117			CK	Rep-3	23.0746	23.9117			CK	Rep-3	23.0746	23.9117			CK	Rep-3	23.0746	23.9117
U	Rep-1	27.6878	27.6426			S2	Rep-1	27.8782	27.1233			3h	Rep-1	22.5869	26.2076			3h	Rep-1	25.248	26.7781			3h	Rep-1	24.9188	26.2676			3h	Rep-1	23.5277	24.6782
U	Rep-2	27.7228	27.7901			S2	Rep-2	27.6629	27.0034			3h	Rep-2	25.9358	26.2794			3h	Rep-2	25.4378	26.6268			3h	Rep-2	24.9411	26.4159			3h	Rep-2	23.4447	24.8345
U	Rep-3	27.9961	27.689			S2	Rep-3	27.6907	27.2676			3h	Rep-3	26.4189	26.1192			3h	Rep-3	25.4036	26.6197			3h	Rep-3	25.0707	26.3228			3h	Rep-3	23.6836	24.8314
Rn	Rep-1	27.9486	27.7782			S3	Rep-1	26.9988	26.4196			6h	Rep-1	26.2465	27.6503			6h	Rep-1	25.4956	26.9503			6h	Rep-1	24.6683	26.3311			6h	Rep-1	23.9076	25.9109
Rn	Rep-2	27.924	27.6249			S3	Rep-2	27.1876	26.5549			6h	Rep-2	26.1872	27.7734			6h	Rep-2	25.7405	26.8629			6h	Rep-2	24.7582	26.2753			6h	Rep-2	24.0609	25.6689
Rn	Rep-3	27.925	27.7891			S3	Rep-3	27.2597	26.3896			6h	Rep-3	26.3084	27.6084			6h	Rep-3	25.5859	26.9937			6h	Rep-3	24.7994	26.212			6h	Rep-3	23.9106	25.9194
UrL	Rep-1	28.3744	28.1781			S4	Rep-1	23.3305	23.007			9h	Rep-1	26.3818	27.5498			9h	Rep-1	25.9432	27.7479			9h	Rep-1	24.714	26.5914			9h	Rep-1	23.815	26.0571
UrL	Rep-2	28.127	28.1364			S4	Rep-2	23.2379	22.9313			9h	Rep-2	26.2603	27.6581			9h	Rep-2	25.7245	27.6551			9h	Rep-2	24.8697	26.607			9h	Rep-2	24.0644	26.2995
UrL	Rep-3	28.059	28.043			S4	Rep-3	23.2291	22.6257			9h	Rep-3	25.6769	27.5591			9h	Rep-3	25.998	27.6624			9h	Rep-3	24.6602	26.5823			9h	Rep-3	23.9062	26.1361
RnL	Rep-1	28.1825	27.7663									12h	Rep-1	26.1726	27.889			12h	Rep-1	24.944	27.3519			12h	Rep-1	24.8807	26.9625			12h	Rep-1	23.6428	26.2379
RnL	Rep-2	28.0359	27.7533					SAND	VmSWEET14			12h	Rep-2	25.8372	27.9347			12h	Rep-2	24.9485	27.4634			12h	Rep-2	24.8092	26.9872			12h	Rep-2	23.676	26.2042
RnL	Rep-3	28.0929	27.7165			S1	Rep-1	28.9411	27.9244			12h	Rep-3	26.2221	27.9322			12h	Rep-3	24.9369	27.3385			12h	Rep-3	24.9723	26.9247			12h	Rep-3	23.5544	26.3203
F	Rep-1	25.027	20.7335			S1	Rep-2	28.8466	27.9076			24h	Rep-1	26.3771	28.5776			24h	Rep-1	25.1533	28.4715			24h	Rep-1	25.1753	27.4277			24h	Rep-1	23.8843	27.9324
F	Rep-2	25.1002	20.6807			S1	Rep-3	28.9198	27.9481			24h	Rep-2	25.9722	28.4628			24h	Rep-2	24.9954	28.5048			24h	Rep-2	25.0864	27.5318			24h	Rep-2	23.6579	27.8195
F	Rep-3	24.9967	20.7334			S2	Rep-1	29.2674	28.93			24h	Rep-3	26.4532	28.4985			24h	Rep-3	25.3116	28.491			24h	Rep-3	25.3283	27.4995			24h	Rep-3	23.436	27.929
						S2	Rep-2	29.2843	28.972
		SAND	VmSWEET10.2			S2	Rep-3	29.4576	28.9171					SAND	VmSWEET9					SAND	VmSWEET9					SAND	VmSWEET9					SAND	VmSWEET9
Rt	Rep-1	25.5358	26.74			S3	Rep-1	27.3473	26.8393			CK	Rep-1	22.8914	31.4706			CK	Rep-1	22.8914	31.9119			CK	Rep-1	22.8914	31.5953			CK	Rep-1	22.8914	31.4344
Rt	Rep-2	25.5846	26.4137			S3	Rep-2	27.5727	26.9004			CK	Rep-2	22.5328	31.2738			CK	Rep-2	22.4328	31.8893			CK	Rep-2	22.4328	31.4344			CK	Rep-2	22.4328	31.5561
Rt	Rep-3	25.8985	26.9184			S3	Rep-3	27.718	26.9258			CK	Rep-3	22.7618	31.3302			CK	Rep-3	22.7618	31.9267			CK	Rep-3	22.7618	31.4179			CK	Rep-3	22.7618	31.4123
U	Rep-1	24.3598	25.3963			S4	Rep-1	23.3305	20.7699			3h	Rep-1	23.5368	34.3819			3h	Rep-1	23.5127	34.9308			3h	Rep-1	22.9651	31.9909			3h	Rep-1	23.5114	33.9109
U	Rep-2	24.3502	25.564			S4	Rep-2	23.2379	20.5807			3h	Rep-2	23.2647	34.2976			3h	Rep-2	23.2805	34.8465			3h	Rep-2	23.1181	31.811			3h	Rep-2	23.1143	33.6689
U	Rep-3	24.3734	25.3698			S4	Rep-3	23.2291	20.7879			3h	Rep-3	23.2378	34.2445			3h	Rep-3	23.7506	34.8229			3h	Rep-3	22.9497	31.8529			3h	Rep-3	23.6431	33.9194
Rn	Rep-1	27.6283	26.659									6h	Rep-1	21.7149	34.5834			6h	Rep-1	22.1905	33.191			6h	Rep-1	22.4556	31.3809			6h	Rep-1	23.3117	33.9261
Rn	Rep-2	27.3564	26.6954					SAND	VmSWEET16			6h	Rep-2	21.8828	34.3382			6h	Rep-2	22.5742	33.7758			6h	Rep-2	22.9112	31.2018			6h	Rep-2	23.7917	33.9098
Rn	Rep-3	27.8469	26.3709			S1	Rep-1	26.9129	24.5216			6h	Rep-3	21.9219	34.4093			6h	Rep-3	22.6458	33.7414			6h	Rep-3	22.8045	31.3755			6h	Rep-3	23.7554	33.8359
UrL	Rep-1	27.7755	26.6064			S1	Rep-2	26.9076	24.4876			9h	Rep-1	23.349	31.6159			9h	Rep-1	22.7605	31.969			9h	Rep-1	23.03	31.1323			9h	Rep-1	24.0398	32.4542
UrL	Rep-2	27.323	26.701			S1	Rep-3	26.9309	24.3159			9h	Rep-2	23.1833	31.7094			9h	Rep-2	22.9096	31.9246			9h	Rep-2	23.1995	31.3697			9h	Rep-2	23.9682	32.675
UrL	Rep-3	27.694	26.7347			S2	Rep-1	27.1927	25.5096			9h	Rep-3	22.9011	31.7282			9h	Rep-3	22.579	31.6382			9h	Rep-3	23.4662	31.3602			9h	Rep-3	24.2007	32.7742
RnL	Rep-1	28.7088	26.893			S2	Rep-2	27.2396	25.3304			12h	Rep-1	22.5979	30.175			12h	Rep-1	23.6816	32.1614			12h	Rep-1	22.0469	29.9748			12h	Rep-1	22.0917	30.6383
RnL	Rep-2	28.7291	26.9048			S2	Rep-3	27.2408	25.4388			12h	Rep-2	22.5219	30.4811			12h	Rep-2	23.1822	32.1001			12h	Rep-2	22.3347	29.9945			12h	Rep-2	22.3904	30.3169
RnL	Rep-3	28.9942	26.9212			S3	Rep-1	27.4859	27.6383			12h	Rep-3	22.4698	30.1911			12h	Rep-3	23.416	32.3061			12h	Rep-3	22.3733	30.087			12h	Rep-3	21.9105	30.6103
F	Rep-1	29.2157	27.1656			S3	Rep-2	27.5175	27.6047			24h	Rep-1	23.7628	30.6538			24h	Rep-1	23.5203	32.4579			24h	Rep-1	23.9446	31.6662			24h	Rep-1	24.8392	31.8779
F	Rep-2	28.8875	27.2854			S3	Rep-3	27.4862	27.6183			24h	Rep-2	23.9599	30.7789			24h	Rep-2	23.6366	32.2716			24h	Rep-2	24.2788	31.9629			24h	Rep-2	24.9161	31.7986
F	Rep-3	29.11	27.3442			S4	Rep-1	23.3305	20.9434			24h	Rep-3	23.5856	30.768			24h	Rep-3	23.8533	32.4231			24h	Rep-3	24.3886	31.7979			24h	Rep-3	24.6248	31.9095
						S4	Rep-2	23.2379	20.915
		SAND	VmSWEET12			S4	Rep-3	23.2291	20.723					SAND	VmSWEET10					SAND	VmSWEET10					SAND	VmSWEET10					SAND	VmSWEET10
Rt	Rep-1	24.7543	26.7926									CK	Rep-1	22.8914	31.7646			CK	Rep-1	22.8914	31.7646			CK	Rep-1	22.8914	31.7646			CK	Rep-1	22.8914	31.7646
Rt	Rep-2	24.7853	26.6835									CK	Rep-2	22.5328	31.5896			CK	Rep-2	22.4328	31.5896			CK	Rep-2	22.4328	31.5896			CK	Rep-2	22.4328	31.5896
Rt	Rep-3	24.544	26.7494									CK	Rep-3	22.7618	31.4136			CK	Rep-3	22.7618	31.4136			CK	Rep-3	22.7618	31.4136			CK	Rep-3	22.7618	31.4136
U	Rep-1	22.8683	20.465									3h	Rep-1	23.5368	32.5892			3h	Rep-1	23.5127	33.4675			3h	Rep-1	22.9651	32.5222			3h	Rep-1	23.5114	32.9949
U	Rep-2	22.7853	20.543									3h	Rep-2	23.2647	32.8807			3h	Rep-2	23.2805	33.2213			3h	Rep-2	23.1181	32.9733			3h	Rep-2	23.1143	32.9018
U	Rep-3	22.7928	20.6261									3h	Rep-3	23.2378	32.5044			3h	Rep-3	23.7506	33.2558			3h	Rep-3	22.9497	32.7079			3h	Rep-3	23.6431	32.8964
Rn	Rep-1	27.6878	29.6747									6h	Rep-1	21.7149	31.604			6h	Rep-1	22.1905	32.5158			6h	Rep-1	22.4556	32.9452			6h	Rep-1	23.3117	32.7146
Rn	Rep-2	27.7228	29.5837									6h	Rep-2	21.8828	31.7168			6h	Rep-2	22.5742	32.4711			6h	Rep-2	22.9112	32.8514			6h	Rep-2	23.7917	32.8809
Rn	Rep-3	27.9961	29.5644									6h	Rep-3	21.9219	31.9497			6h	Rep-3	22.6458	32.8596			6h	Rep-3	22.8045	33.2631			6h	Rep-3	23.7554	32.7944
UrL	Rep-1	27.9486	29.9788									9h	Rep-1	23.349	32.7331			9h	Rep-1	22.7605	33.2018			9h	Rep-1	23.03	33.5075			9h	Rep-1	24.0398	33.6402
UrL	Rep-2	27.924	29.8621									9h	Rep-2	23.1833	32.4465			9h	Rep-2	22.9096	33.5004			9h	Rep-2	23.1995	33.6843			9h	Rep-2	23.9682	33.377
UrL	Rep-3	27.925	29.8085									9h	Rep-3	22.9011	32.8563			9h	Rep-3	22.579	33.3651			9h	Rep-3	23.4662	33.4709			9h	Rep-3	24.2007	33.5521
RnL	Rep-1	28.3744	29.8082									12h	Rep-1	22.5979	32.3528			12h	Rep-1	23.6816	31.9879			12h	Rep-1	22.0469	33.1531			12h	Rep-1	22.0917	33.479
RnL	Rep-2	28.127	29.6536									12h	Rep-2	22.5219	32.2564			12h	Rep-2	23.1822	31.9548			12h	Rep-2	22.3347	33.2099			12h	Rep-2	22.3904	33.2259
RnL	Rep-3	28.059	29.7544									12h	Rep-3	22.4698	32.1689			12h	Rep-3	23.416	31.8749			12h	Rep-3	22.3733	33.2933			12h	Rep-3	21.9105	33.9691
F	Rep-1	28.1825	29.6415									24h	Rep-1	23.7628	32.9231			24h	Rep-1	23.5203	33.2871			24h	Rep-1	23.9446	32.1941			24h	Rep-1	24.8392	34.3773
F	Rep-2	28.0359	29.6767									24h	Rep-2	23.9599	32.9826			24h	Rep-2	23.6366	33.6424			24h	Rep-2	24.2788	32.5634			24h	Rep-2	24.9161	34.2595
F	Rep-3	28.0929	29.4479									24h	Rep-3	23.5856	32.8232			24h	Rep-3	23.8533	33.8862			24h	Rep-3	24.3886	32.0013			24h	Rep-3	24.6248	34.4128
		SAND	VmSWEET13											SAND	VmSWEET11					SAND	VmSWEET11					SAND	VmSWEET11					SAND	VmSWEET11
Rt	Rep-1	24.7543	27.5816									CK	Rep-1	22.9401	31.9354			CK	Rep-1	22.9401	31.9354			CK	Rep-1	22.9401	31.9354			CK	Rep-1	22.9401	31.9354
Rt	Rep-2	24.7853	27.6858									CK	Rep-2	22.5822	31.8676			CK	Rep-2	22.5822	31.8676			CK	Rep-2	22.5822	31.8676			CK	Rep-2	22.5822	31.8676
Rt	Rep-3	24.544	27.1513									CK	Rep-3	23.0746	31.9267			CK	Rep-3	23.0746	31.9267			CK	Rep-3	23.0746	31.9267			CK	Rep-3	23.0746	31.9267
U	Rep-1	22.8683	25.913									3h	Rep-1	24.6374	34.4781			3h	Rep-1	24.9562	34.1195			3h	Rep-1	25.1978	35.7622			3h	Rep-1	23.9412	35.6362
U	Rep-2	22.7853	25.8773									3h	Rep-2	24.731	34.0591			3h	Rep-2	25.068	34.0211			3h	Rep-2	25.6681	35.7208			3h	Rep-2	24.8447	35.6754
U	Rep-3	22.7928	25.5924									3h	Rep-3	24.9219	34.2946			3h	Rep-3	25.1703	34.2572			3h	Rep-3	25.377	35.5268			3h	Rep-3	24.0299	35.7043
Rn	Rep-1	28.3369	30.8168									6h	Rep-1	24.9095	33.5834			6h	Rep-1	25.7409	35.4711			6h	Rep-1	25.3098	35.4306			6h	Rep-1	22.9531	35.5472
Rn	Rep-2	28.6303	30.968									6h	Rep-2	24.965	34.3382			6h	Rep-2	25.8147	35.3868			6h	Rep-2	25.2215	35.3431			6h	Rep-2	22.7062	35.3503
Rn	Rep-3	28.6771	30.8168									6h	Rep-3	24.9659	35.0093			6h	Rep-3	25.7924	35.2674			6h	Rep-3	25.1527	35.6195			6h	Rep-3	23.0066	35.7035
UrL	Rep-1	28.1167	30.8398									9h	Rep-1	24.7575	34.1056			9h	Rep-1	25.7034	35.5991			9h	Rep-1	24.6977	34.8062			9h	Rep-1	23.5797	33.9687
UrL	Rep-2	27.9781	30.8398									9h	Rep-2	24.9829	33.9021			9h	Rep-2	25.7408	35.5989			9h	Rep-2	24.9057	34.7797			9h	Rep-2	23.8488	33.7629
UrL	Rep-3	28.1064	30.6796									9h	Rep-3	25.034	34.0869			9h	Rep-3	25.9323	35.7969			9h	Rep-3	24.6512	34.5289			9h	Rep-3	23.4406	33.9261
RnL	Rep-1	29.9269	32.5685									12h	Rep-1	24.97	34.0697			12h	Rep-1	25.779	34.9506			12h	Rep-1	25.4347	34.4623			12h	Rep-1	23.9228	32.3063
RnL	Rep-2	29.6753	32.5685									12h	Rep-2	25.0438	34.1223			12h	Rep-2	25.6598	34.9303			12h	Rep-2	25.4591	34.4816			12h	Rep-2	23.9889	32.7461
RnL	Rep-3	29.9	32.1694									12h	Rep-3	25.1076	34.2796			12h	Rep-3	25.7243	34.9876			12h	Rep-3	25.4607	34.7434			12h	Rep-3	24.1068	32.6219
F	Rep-1	28.6907	31.2313									24h	Rep-1	25.2969	28.4691			24h	Rep-1	24.8729	33.3724			24h	Rep-1	25.4849	35.3891			24h	Rep-1	25.2032	30.2982
F	Rep-2	28.5666	31.1792									24h	Rep-2	25.176	28.3662			24h	Rep-2	24.8643	33.233			24h	Rep-2	25.397	35.2743			24h	Rep-2	24.8711	30.2224
F	Rep-3	28.735	31.377									24h	Rep-3	25.1697	28.3383			24h	Rep-3	24.7893	33.388			24h	Rep-3	25.4174	35.2918			24h	Rep-3	25.1448	30.2455
		SAND	VmSWEET14											SAND	VmSWEET12					SAND	VmSWEET12					SAND	VmSWEET12					SAND	VmSWEET12
Rt	Rep-1	26.373	27.9315									CK	Rep-1	27.3167	35.4609			CK	Rep-1	25.3167	35.8088			CK	Rep-1	26.3167	35.4088			CK	Rep-1	26.3167	35.4088
Rt	Rep-2	26.1049	27.8583									CK	Rep-2	27.5291	35.9372			CK	Rep-2	25.5291	35.9372			CK	Rep-2	26.5291	35.9372			CK	Rep-2	26.5291	35.9372
Rt	Rep-3	26.1887	27.7849									CK	Rep-3	27.3308	35.8713			CK	Rep-3	25.3308	35.8713			CK	Rep-3	26.3308	35.8713			CK	Rep-3	26.3308	35.8713
U	Rep-1	25.027	24.5915									3h	Rep-1	25.6374	35.2819			3h	Rep-1	24.6374	34.9503			3h	Rep-1	24.6374	34.1956			3h	Rep-1	24.6374	34.1564
U	Rep-2	25.1002	24.625									3h	Rep-2	25.731	35.2976			3h	Rep-2	24.731	34.9695			3h	Rep-2	24.731	34.0912			3h	Rep-2	24.731	34.2269
U	Rep-3	24.9967	24.7926									3h	Rep-3	25.9219	35.2445			3h	Rep-3	24.9219	34.6922			3h	Rep-3	24.9219	34.0168			3h	Rep-3	24.9219	34.2375
Rn	Rep-1	28.3369	32.9497									6h	Rep-1	25.9095	35.0971			6h	Rep-1	24.9095	35.0245			6h	Rep-1	24.9095	34.7622			6h	Rep-1	24.9095	34.3593
Rn	Rep-2	28.6303	32.7019									6h	Rep-2	25.965	35.2357			6h	Rep-2	24.965	35.1718			6h	Rep-2	24.965	34.841			6h	Rep-2	24.965	34.3759
Rn	Rep-3	28.6771	32.6846									6h	Rep-3	25.9659	35.1468			6h	Rep-3	24.9659	35.0392			6h	Rep-3	24.9659	34.8145			6h	Rep-3	24.9659	34.3262
UrL	Rep-1	28.1167	31.8191									9h	Rep-1	25.7575	34.5041			9h	Rep-1	24.7575	34.9312			9h	Rep-1	24.8575	34.566			9h	Rep-1	24.7575	34.3484
UrL	Rep-2	27.9781	31.7255									9h	Rep-2	25.9829	34.55			9h	Rep-2	24.9829	34.8273			9h	Rep-2	24.9829	34.4014			9h	Rep-2	24.9829	34.305
UrL	Rep-3	28.1064	31.579									9h	Rep-3	26.034	34.5465			9h	Rep-3	25.034	34.8988			9h	Rep-3	25.034	34.4714			9h	Rep-3	25.034	34.371
RnL	Rep-1	29.9269	32.6497									12h	Rep-1	24.97	31.5206			12h	Rep-1	24.97	35.0883			12h	Rep-1	24.97	34.6851			12h	Rep-1	24.97	34.4723
RnL	Rep-2	29.6753	32.8944									12h	Rep-2	25.0438	31.5249			12h	Rep-2	25.0438	35.1402			12h	Rep-2	25.0438	34.7791			12h	Rep-2	25.0438	34.4112
RnL	Rep-3	29.9	32.7455									12h	Rep-3	25.1076	31.5268			12h	Rep-3	25.1076	35.0724			12h	Rep-3	25.1076	34.7217			12h	Rep-3	25.1076	34.3114
F	Rep-1	28.6907	31.8829									24h	Rep-1	26.2969	32.8414			24h	Rep-1	25.2969	35.507			24h	Rep-1	25.2969	34.9914			24h	Rep-1	25.2969	34.0042
F	Rep-2	28.5666	31.8933									24h	Rep-2	26.176	32.8339			24h	Rep-2	25.176	35.3235			24h	Rep-2	25.176	34.9179			24h	Rep-2	25.176	34.0941
F	Rep-3	28.735	32.0814									24h	Rep-3	26.1697	32.8965			24h	Rep-3	25.1697	35.5127			24h	Rep-3	25.1697	34.9514			24h	Rep-3	25.1697	34.1899
		SAND	VmSWEET16											SAND	VmSWEET13					SAND	VmSWEET13					SAND	VmSWEET13					SAND	VmSWEET13
Rt	Rep-1	26.373	25.9535									CK	Rep-1	22.9401	24.9147			CK	Rep-1	22.9401	24.9147			CK	Rep-1	22.9401	24.9147			CK	Rep-1	22.9401	24.9147
Rt	Rep-2	26.1049	26.0926									CK	Rep-2	22.5822	24.9534			CK	Rep-2	22.5822	24.9534			CK	Rep-2	22.5822	24.9534			CK	Rep-2	22.5822	24.9534
Rt	Rep-3	26.1887	26.4343									CK	Rep-3	23.0746	24.8221			CK	Rep-3	23.0746	24.8221			CK	Rep-3	23.0746	24.8221			CK	Rep-3	23.0746	24.8221
U	Rep-1	25.027	25.5651									3h	Rep-1	22.5869	27.0465			3h	Rep-1	25.248	27.5886			3h	Rep-1	24.9188	26.9268			3h	Rep-1	23.5277	25.9758
U	Rep-2	25.1002	25.2486									3h	Rep-2	25.9358	26.9676			3h	Rep-2	25.4378	27.5488			3h	Rep-2	24.9411	26.8419			3h	Rep-2	23.4447	25.8698
U	Rep-3	24.9967	25.7315									3h	Rep-3	26.4189	27.049			3h	Rep-3	25.4036	27.7292			3h	Rep-3	25.0707	26.9829			3h	Rep-3	23.6836	25.8182
Rn	Rep-1	27.6283	23.511									6h	Rep-1	26.2465	28.5981			6h	Rep-1	25.4956	27.9135			6h	Rep-1	24.6683	27.0112			6h	Rep-1	23.9076	26.1542
Rn	Rep-2	27.3564	23.6529									6h	Rep-2	26.1872	28.6978			6h	Rep-2	25.7405	27.7359			6h	Rep-2	24.7582	27.1714			6h	Rep-2	24.0609	26.375
Rn	Rep-3	27.8469	23.3809									6h	Rep-3	26.3084	28.5797			6h	Rep-3	25.5859	27.8615			6h	Rep-3	24.7994	27.09			6h	Rep-3	23.9106	26.3742
UrL	Rep-1	27.7755	22.4941									9h	Rep-1	26.3818	28.6775			9h	Rep-1	25.9432	28.268			9h	Rep-1	24.714	27.2077			9h	Rep-1	23.815	26.4555
UrL	Rep-2	27.323	22.8828									9h	Rep-2	26.2603	28.8611			9h	Rep-2	25.7245	28.1329			9h	Rep-2	24.8697	27.2374			9h	Rep-2	24.0644	26.2082
UrL	Rep-3	27.694	22.5754									9h	Rep-3	25.6769	28.6602			9h	Rep-3	25.998	28.0067			9h	Rep-3	24.6602	27.3749			9h	Rep-3	23.9062	26.0919
RnL	Rep-1	28.7088	28.0356									12h	Rep-1	26.1726	28.5846			12h	Rep-1	24.944	28.08			12h	Rep-1	24.8807	27.3385			12h	Rep-1	23.6428	24.9554
RnL	Rep-2	28.7291	28.5922									12h	Rep-2	25.8372	28.4453			12h	Rep-2	24.9485	28.1033			12h	Rep-2	24.8092	27.4885			12h	Rep-2	23.676	24.8781
RnL	Rep-3	28.9942	28.4433									12h	Rep-3	26.2221	28.5056			12h	Rep-3	24.9369	28.0277			12h	Rep-3	24.9723	27.3928			12h	Rep-3	23.5544	24.9295
F	Rep-1	29.2157	27.4043									24h	Rep-1	26.3771	27.4088			24h	Rep-1	25.1533	27.9124			24h	Rep-1	25.1753	27.4498			24h	Rep-1	23.8843	24.906
F	Rep-2	28.8875	27.3927									24h	Rep-2	25.9722	27.3594			24h	Rep-2	24.9954	27.6822			24h	Rep-2	25.0864	27.5168			24h	Rep-2	23.6579	24.8447
F	Rep-3	29.11	27.7087									24h	Rep-3	26.4532	27.4259			24h	Rep-3	25.3116	27.8103			24h	Rep-3	25.3283	27.5434			24h	Rep-3	23.436	24.8651
